# Supplementary material for: Quantifying macrocyclization-induced strain utilizing N-phenylimides as conformational reporters
Source: Royal Society of Chemistry journal article supplement (doi:10.1039/d3cc06296a), 2024-01-01
Supplement: d3cc06296a1.pdf [file d3cc06296a1.pdf]

Supporting Information for  
**Quantifying Macrocyclization-induced Strain Utilizing N-phenylimides as  
Conformational Reporters**

Bright U. Emenike,<sup>a</sup> David W. Shinn,<sup>b</sup> Ronald A. Spinelle,<sup>a</sup> Barney Yoo,<sup>c</sup> and Ambar M. Rosario<sup>a</sup>

[a] Department of Chemistry and Physics, State University of New York, 223 Store Hill Road, Old Westbury, NY  
11568, USA

[b] United States Merchant Marine Academy, 300 Steamboat Road Kings Point, NY 11024, United States

[c] Department of Chemistry, Hunter College, City University of New York, New York, NY 10065, USA

[emenikeb@oldwestbury.edu](mailto:emenikeb@oldwestbury.edu)

Table of Contents

|                                                                                     |           |
|-------------------------------------------------------------------------------------|-----------|
| <b>General Experimental</b> .....                                                   | <b>2</b>  |
| <b>Measurement of interaction energies (<math>\Delta G</math>)</b> .....            | <b>2</b>  |
| <b>Synthesis</b> .....                                                              | <b>2</b>  |
| <b>Preparation of 9,10-dichloromethylanthracene</b> .....                           | <b>2</b>  |
| <b>Diels-Alder: Preparation and characterization of Balances</b> .....              | <b>3</b>  |
| General Procedure 2 .....                                                           | <b>3</b>  |
| Balance 1 .....                                                                     | <b>3</b>  |
| Balance 2 .....                                                                     | <b>4</b>  |
| Balance 3 .....                                                                     | <b>4</b>  |
| Balance 1 <sub>N</sub> .....                                                        | <b>4</b>  |
| Balance 1 <sub>S</sub> .....                                                        | <b>5</b>  |
| Control balance C1.....                                                             | <b>5</b>  |
| Control balance C2.....                                                             | <b>6</b>  |
| <b>Syntheses of the anthracenyl crown ethers</b> .....                              | <b>6</b>  |
| General procedure 1: .....                                                          | <b>6</b>  |
| <b>X-ray crystal structure of Balance 1 (CCDC number 1858930)</b> .....             | <b>10</b> |
| <b>X-ray crystal structure of Balance 1<sub>S</sub> (CCDC number 2321755)</b> ..... | <b>11</b> |
| <b>X-ray crystal structure of Balance C1 (CCDC number 2321756)</b> .....            | <b>12</b> |

## General Experimental

All reactions were carried out under an atmosphere of nitrogen in oven-dried glassware with magnetic stirring unless otherwise indicated. Reagents were purchased from commercial sources and used without further purification. Solvents for chemical reaction were dried. Purification of the reaction products was carried out by flash chromatography using silica gel 40-63  $\mu\text{m}$  (230-400 mesh) unless otherwise stated. Reactions were monitored by proton NMR and/or thin layer chromatography. Visualization was accomplished with UV light, staining with 5%  $\text{KMnO}_4$  or with panisaldehyde in EtOH solution. NMR was recorded using a 400 MHz Bruker spectrometer. Data are reported as (s = singlet, d = doublet, t = triplet, q = quartet, m = multiplet; integration; coupling constant(s) in Hz). Melting points were measured with a Gallenkamp melting point apparatus.

## Measurement of interaction energies ( $\Delta G$ )

The folded/unfolded ratios were measured by proton NMR spectra at room temperature ( $\sim 25^\circ\text{C}$ ). The peak areas corresponding to the ortho proton in the folded and unfolded states were integrated. The CH- $\pi$  interaction energies were estimated from the equation:  $\Delta G = -RT\ln K = -RT\ln[\text{folded}]/[\text{unfolded}]$ .

## Synthesis

### Preparation of 9,10-dichloromethylanthracene

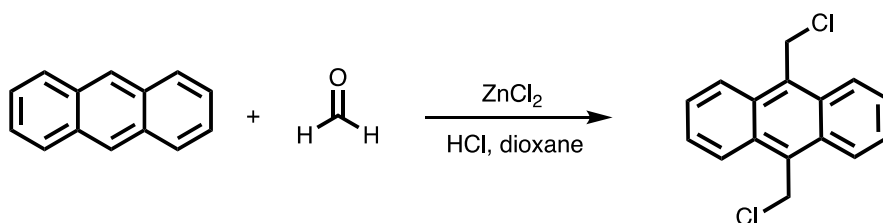

To a stirred solution of anthracene (1.78 g, 10 mmol), anhydrous  $\text{ZnCl}_2$  (1.64 g, 12 mmol), and paraformaldehyde (1.50 g, 50 mmol) in dioxane (20 mL) was slowly added concentrated aqueous hydrochloric acid (1N, 40 mL) at room temperature. After addition,

the mixture was refluxed gently for 3 h and allowed to stand for 16 h at room temperature. The resulting one granular solid was separated by filtration and washed with H<sub>2</sub>O and dioxane to afford the crude product. The crude product was recrystallized from toluene to give 5 as yellowish solid. Yield: 65%. The NMR spectrum are consistent with previous synthesis.<sup>1</sup>

### Diels-Alder: Preparation and characterization of Balances

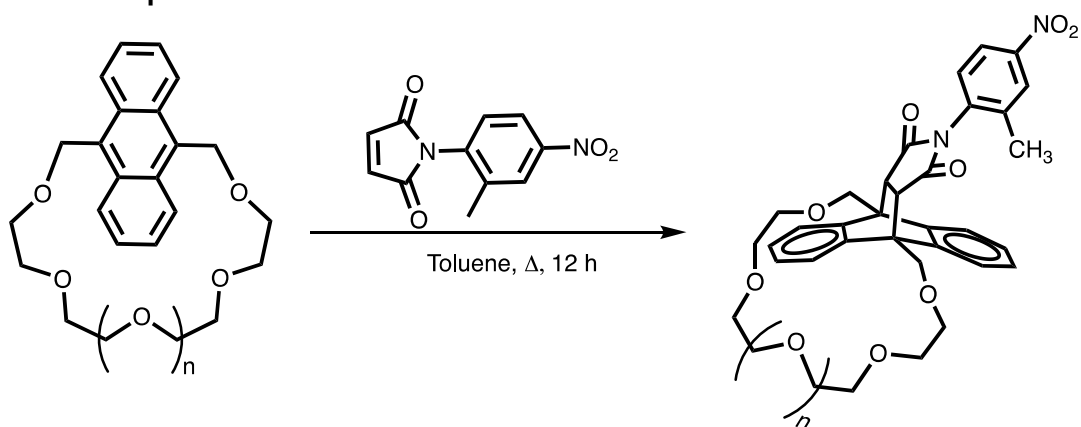

General Procedure 2:<sup>2</sup> A mixture of the appropriate anthracenyl crown ether (0.9 mmol) and 1-(2-methyl-4-nitrophenyl)-1H-pyrrole-2,5-dione (1.0 mmol) in 1 ml xylene was heated in a sealed reaction tube overnight. The cooled reaction was then purified by column chromatography to yield the balance.

**Balance 1.** Melting point = 232-233°C

<sup>1</sup>H-NMR (400 MHz; CDCl<sub>3</sub>): δ 8.09-7.93 (m, 2H), 7.77-7.72 (m, 2H), 7.62-7.58 (m, 2H), 7.47 (dd, *J* = 5.7, 3.3 Hz, 1H), 7.38-7.32 (m, 3H), 7.05-7.03 (m, 1H), 5.75 (d, *J* = 8.6 Hz, 1H), 5.08 (dd, *J* = 10.4, 4.8 Hz, 2H), 4.77-4.74 (m, 2H), 3.99 (q, *J* = 3.2 Hz, 4H), 3.73-3.57 (m, 4H), 3.15-3.14 (m, 2H), 3.03-2.95 (m, 4H), 2.47-2.34 (m, 2H), 2.13-2.06 (m, 4H), 1.25 (s, 1H).

<sup>13</sup>C NMR (101 MHz; CDCl<sub>3</sub>): δ 173.6, 173.5, 148.1, 148.1, 147.9, 141.8, 141.2, 138.8, 138.7, 138.7, 138.7, 138.51, 137.8, 136.2, 136.2, 129.0, 128.9, 127.2, 127.1, 127.0, 126.9, 126.7, 126.7, 126.6, 126.6, 126.5, 125.8, 125.7, 125.1, 124.8, 124.8, 124.7, 124.4,

124.3, 124.2, 122.0, 121.5, 72.2, 72.0, 71.1, 71.1, 70.6, 70.5, 68.7, 68.6, 67.5, 67.3, 51.4, 50.7, 50.4, 17.9, 17.2

HRMS calculated for  $C_{35}H_{36}N_2O_9$   $[M+H]^+$  629.2499, found 629.2489

**Balance 2.** Melting point = 189-190°C

$^1H$ -NMR (400 MHz;  $CDCl_3$ ):  $\delta$  8.10-7.87 (m, 2H), 7.67 (ddd,  $J$  = 10.4, 5.7, 3.3 Hz, 2H), 7.27-7.10 (m, 6H), 5.65 (d,  $J$  = 8.6 Hz, 1H), 4.98-4.82 (m, 4H), 4.21-4.14 (m, 4H), 4.03-3.99 (m, 2H), 3.80-3.53 (m, 12H), 3.36-3.35 (m, 4H), 2.23 (s, 1H), 1.18 (s, 2H).

$^{13}C$  NMR (101 MHz;  $CDCl_3$ ):  $\delta$  175.6, 175.5, 147.9, 147.8, 143.2, 142.5, 140.7, 140.4, 138.4, 138.3, 137.2, 137.1, 129.1, 128.9, 126.8, 126.6, 126.1, 126.0, 125.6, 124.2, 124.0, 122.1, 121.9, 121.8, 121.6, 71.1, 71.0, 70.9, 70.9, 70.8, 70.7, 70.5, 70.4, 70.1, 67.1, 66.9, 49.2, 48.9, 46.1, 45.9, 16.8

HRMS calculated for  $C_{37}H_{40}N_2O_{10}$   $[M+H]^+$  673.2761, found 673.2755

**Balance 3.** Melting point = 104-109°C

$^1H$ -NMR (400 MHz;  $CDCl_3$ ):  $\delta$  8.12-7.88 (m, 2H), 7.69-7.62 (m, 2H), 7.27-7.19 (m, 6H), 5.66 (d,  $J$  = 8.5 Hz, 1H), 4.98-4.76 (m, 4H), 4.04-3.80 (m, 10H), 3.71-3.61 (m, 8H), 3.48-3.28 (m, 7H), 2.23 (s, 1H), 1.17 (s, 2H).

$^{13}C$  NMR (101 MHz;  $CDCl_3$ ):  $\delta$  16.7, 17.9, 46.5, 48.3, 48.6, 67.7, 70.3, 70.4, 70.5, 71.0, 71.0, 71.3, 121.6, 121.8, 122.4, 123.8, 123.1, 125.6, 125.6, 126.1, 126.3, 126.8, 126.9, 128.8, 129.3, 137.0, 138.3, 138.3, 140.4, 142.4, 143.0, 147.8, 148.0, 174.7

HRMS calculated for  $C_{39}H_{44}N_2O_{11}$   $[M+H]^+$  717.3023, found 717.3017

**Balance 1<sub>N</sub>.** Melting point = 135-136°C

$^1H$ -NMR (400 MHz;  $CDCl_3$ ):  $\delta$  8.09-7.93 (m, 2H), 7.80 (ddd,  $J$  = 9.6, 5.9, 3.5 Hz, 2H), 7.60 (ddd,  $J$  = 7.0, 5.8, 3.3 Hz, 2H), 7.49 (dd,  $J$  = 5.7, 3.3 Hz, 1H), 7.42-7.38 (m, 3H), 7.17 (d,  $J$  =

6.9 Hz, 3H), 7.04 (dd,  $J = 8.2, 0.4$  Hz, ), 6.80-6.79 (m, 2H), 5.76 (d,  $J = 8.6$  Hz, 1H), 5.06 (dd,  $J = 10.6, 5.1$  Hz, 2H), 4.77 (dd,  $J = 10.6, 2.5$  Hz, 2H), 4.00-3.97 (m, 4H), 3.64-3.45 (m, 4H), 3.13 (dd,  $J = 5.5, 2.8$  Hz, 4H), 2.83-2.70 (m, 4H), 2.11 (s, 2H), 1.75-1.64 (m, 2H), 1.46-1.37 (m, 2H), 1.26 (s, 2H).

$^{13}\text{C}$  NMR (101 MHz;  $\text{CDCl}_3$ ):  $\delta$  173.6, 173.6, 148.1, 148.0, 142.0, 141.4, 140.9, 138.8, 138.8, 138.5, 137.8, 136.2, 136.2, 129.0, 128.9, 127.8, 127.1, 126.9, 126.4, 126.3, 125.8, 125.7, 125.0, 124.6, 124.4, 124.2, 122.0, 121.5, 72.9, 72.7, 72.3, 72.3, 69.9, 67.9, 67.7, 60.0, 59.9, 56.2, 56.1, 51.4, 50.8, 50.5, 30.9, 29.7, 17.9, 17.2

HRMS calculated for  $\text{C}_{42}\text{H}_{43}\text{N}_3\text{O}_8$   $[\text{M}+\text{H}]^+$  718.3128, found 718.3119

**Balance 1s.** Melting point = 247-250°C

$^1\text{H}$ -NMR (400 MHz;  $\text{CDCl}_3$ ):  $\delta$  8.09-7.92 (m, 2H), 7.74-7.70 (m, 2H), 7.61-7.57 (m, 2H), 7.45-7.44 (m, 1H), 7.33 (ddd,  $J = 7.7, 5.7, 3.3$  Hz, 3H), 7.04 (d,  $J = 8.4$  Hz, ), 5.74 (d,  $J = 8.6$  Hz, 1H), 5.09 (dd,  $J = 10.4, 2.3$  Hz, 2H), 4.72 (d,  $J = 10.4$  Hz, 2H), 3.96 (q,  $J = 4.0$  Hz, 4H), 3.73-3.58 (m, 4H), 3.19-3.09 (m, 2H), 3.03-2.96 (m, 4H), 2.10 (s, 2H), 2.10 (s, 2H), 1.52-1.30 (m, 4H), 1.24 (s, 1H).

$^{13}\text{C}$  NMR (101 MHz;  $\text{CDCl}_3$ ):  $\delta$  173.6, 173.5, 148.1, 148.0, 141.9, 141.3, 138.7, 138.7, 138.5, 137.8, 136.2, 129.0, 128.88, 127.0, 126.8, 126.5, 126.4, 125.8, 125.7, 125.2, 124.8, 124.3, 124.2, 122.0, 121.5, 72.8, 72.8, 72.0, 71.8, 70.6, 67.9, 67.7, 51.2, 50.5, 50.2, 31.5, 31.5, 17.9, 17.1

HRMS calculated for  $\text{C}_{35}\text{H}_{36}\text{N}_2\text{O}_8\text{S}$   $[\text{M}+\text{H}]^+$  645.2271, found 645.2260

**Control balance C1.** Melting point = 104-106°C.

$^1\text{H}$ -NMR (400 MHz;  $\text{CDCl}_3$ ):  $\delta$  8.11-7.88 (m, 2H), 7.67 (ddd,  $J = 12.4, 5.7, 3.3$  Hz, 2H), 7.27-7.14 (m, 6H), 5.67 (d,  $J = 8.7$  Hz, 1H), 4.93-4.85 (m, 4H), 4.05-4.01 (m, 4H), 3.75 (dt,  $J = 3.8, 1.8$  Hz, 6H), 3.46 (s, 6H), 2.19 (d,  $J = 0.1$  Hz, 1H), 1.17 (s, 2H).

<sup>13</sup>C NMR (101 MHz; CDCl<sub>3</sub>): δ 174.4, 174.3, 148.0, 148.0, 142.7, 142.1, 140.1, 140.0, 139.6, 138.3, 138.1, 136.7, 136.6, 129.2, 128.8, 127.0, 126.9, 126.4, 126.3, 126.3, 125.7, 125.6, 125.5, 123.9, 123.7, 122.8, 122.7, 122.7, 122.6, 122.5, 122.5, 122.5, 122.5, 122.4, 122.4, 121.9, 121.6, 121.5, 71.9, 71.9, 71.0, 71.0, 68.2, 68.0, 68.0, 59.1, 59.0, 48.5, 48.2, 47.0, 47.0, 46.9, 18.0, 16.7

**Control balance C2.** Melting point = 176-178°C.

<sup>1</sup>H-NMR (400 MHz; CDCl<sub>3</sub>): δ 8.11-7.89 (m, 2H), 7.62 (ddd, *J* = 11.1, 5.7, 3.3 Hz, 2H), 7.25 (dt, *J* = 5.4, 2.6 Hz, 7H), 7.16 (d, *J* = 8.6 Hz, 1H), 5.66 (d, *J* = 8.6 Hz, ), 4.87-4.76 (m, 4H), 3.95-3.89 (m, 4H), 3.80-3.70 (m, 2H), 2.20 (s, 1H), 1.42-1.38 (m, 6H), 1.17 (s, 2H).

<sup>13</sup>C NMR (101 MHz; CDCl<sub>3</sub>): δ 174.37, 174.33, 147.98, 147.88, 143.0, 142.3, 140.2, 139.8, 138.4, 138.1, 136.74, 136.66, 129.2, 128.9, 127.02, 126.86, 126.38, 126.28, 125.69, 125.62, 123.81, 123.62, 122.72, 122.71, 121.9, 121.6, 77.4, 77.0, 76.7, 67.39, 67.20, 67.14, 67.13, 48.4, 48.2, 47.13, 47.11, 18.0, 16.7, 15.31, 15.29

### Syntheses of the anthracenyl crown ethers

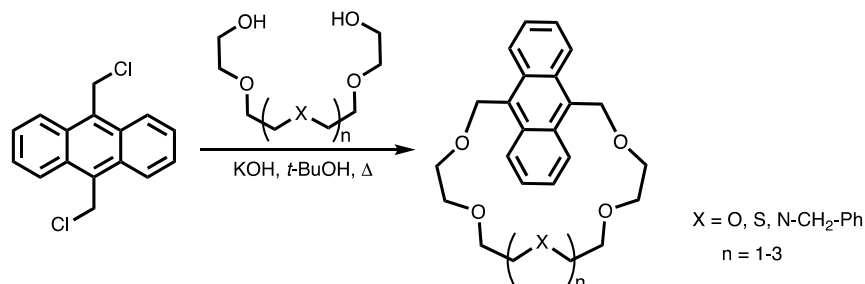

#### General procedure 1:

In a 250 ml round-bottom flask, a mixture of 4 mmol of the appropriate polyethylene glycol, 5 mmol of KOH, and 10 ml of tert-butanol was refluxed with stirring for 30 minutes. The reaction was then removed from heating and diluted with 60 ml of tert-butanol and followed by the addition of 2 mmol (0.55g) of 9,10-bis(chloromethyl)anthracene. The mixture was refluxed overnight, concentrated to a minimal volume, and then diluted with 40 ml of diethyl ether. The resulting organic mixture was washed with water. The organic

phase was concentrated and subjected to flash column chromatography purification using mixtures of ethyl acetate and hexane.

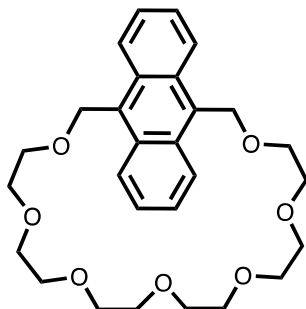

3,6,9,12,15,18,21-hepta-oxa-1(9,10)-anthracenacyclodocosaphane

Prepared according to General Procedure 1. Yield = 32%.  $^1\text{H-NMR}$  (400 MHz;  $\text{CDCl}_3$ ):  $\delta$  8.51 (dd,  $J = 6.9, 3.3$  Hz, 4H), 7.58 (dd,  $J = 6.9, 3.3$  Hz, 4H), 5.59 (s, 4H), 3.79-3.77 (m, 4H), 3.67-3.64 (m, 4H), 3.45-3.43 (m, 4H), 3.39-3.36 (m, 4H), 3.21-3.18 (m, 5H), 3.16-3.14 (m, 4H).

$^{13}\text{-C NMR}$  (101 MHz;  $\text{CDCl}_3$ ):  $\delta$  130.7, 130.5, 125.7, 125.1, 70.8, 70.6, 70.4, 70.3, 69.7, 65.2

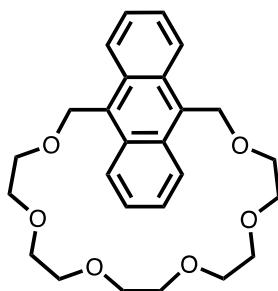

3,6,9,12,15,18-hexa-oxa-1(9,10)-anthracenacyclononadecaphane

Prepared according to General Procedure 1. Yield = 33%.  $^1\text{H-NMR}$  (400 MHz;  $\text{CDCl}_3$ ):  $\delta$  8.52 (dd,  $J = 6.9, 3.3$  Hz, 4H), 7.58 (dd,  $J = 6.8, 3.1$  Hz, 4H), 5.61 (s, 4H), 3.71 (dd,  $J = 5.5, 3.5$  Hz, 6H), 3.56 (dd,  $J = 5.3, 3.6$  Hz, 4H), 3.27-3.20 (m, 8H), 2.95 (s, 4H).

13-C NMR (101 MHz; CDCl<sub>3</sub>): δ 130.7, 130.5, 125.6, 125.2, 70.5, 70.3, 70.1, 69.7, 69.1, 64.8

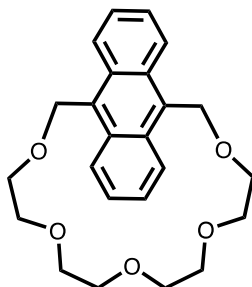

3,6,9,12,15-pentaoxa-1(9,10)-anthracenacyclohexadecaphane

Prepared using General Procedure 1: Yield = 28%. <sup>1</sup>H-NMR (400 MHz; aceton-d<sub>6</sub>): δ 8.63 (dd, *J* = 7.0, 3.3 Hz, 4H), 7.61-7.59 (m, 4H), 5.66 (s, 4H), 3.61-3.59 (m, 5H), 3.30-3.28 (m, 4H), 2.91 (dd, *J* = 5.7, 5.2 Hz, 4H), 2.67 (t, *J* = 5.6 Hz, 4H).

13-C NMR (101 MHz; CDCl<sub>3</sub>): δ 130.7, 130.6, 125.6, 125.2, 77.5, 77.2, 76.8, 70.1, 70.0, 69.9, 69.0, 64.2

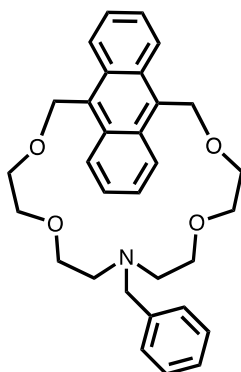

9-benzyl-3,6,12,15-tetraoxa-9-aza-1(9,10)-anthracenacyclohexadecaphane

Prepared using General Procedure 1: Yield = 29%. <sup>1</sup>H-NMR (400 MHz; CDCl<sub>3</sub>): δ 8.55 (dd, *J* = 7.0, 3.3 Hz, 4H), 7.59 (dd, *J* = 6.9, 3.2 Hz, 4H), 7.26-7.12 (m, 5H), 5.63 (s, 4H), 3.61 (t, *J* = 4.5 Hz, 4H), 3.31 (dd, *J* = 8.1, 3.5 Hz, 6H), 2.81 (t, *J* = 6.7 Hz, 4H), 1.89 (t, *J* = 6.7 Hz, 4H).



$^{13}\text{C}$  NMR (101 MHz;  $\text{CDCl}_3$ ):  $\delta$  139.5, 130.8, 130.7, 128.7, 128.0, 126.7, 125.6, 125.2, 69.8, 68.8, 68.8, 64.5, 59.5, 53.5

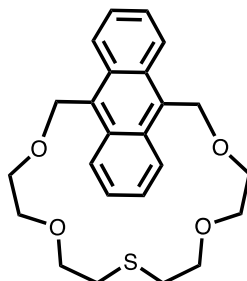

3,6,12,15-tetraoxa-9-thia-1(9,10)-anthracenacyclohexadecaphane

Prepared using General Procedure 1: Yield = 25%.  $^1\text{H}$ -NMR (400 MHz;  $\text{CDCl}_3$ ):  $\delta$  8.54 (dd,  $J = 6.9, 3.3$  Hz, 4H), 7.62-7.59 (m, 4H), 5.64 (s, 4H), 3.70-3.68 (m, 4H), 3.35-3.33 (m, 4H), 2.98 (t,  $J = 7.2$  Hz, 4H), 1.89 (t,  $J = 7.2$  Hz, 4H).

$^{13}\text{C}$  NMR (101 MHz;  $\text{CDCl}_3$ ):  $\delta$  130.8, 130.6, 125.7, 125.2, 70.7, 69.8, 69.7, 64.7, 31.5

## X-ray crystal structure of Balance 1 (CCDC number 1858930)

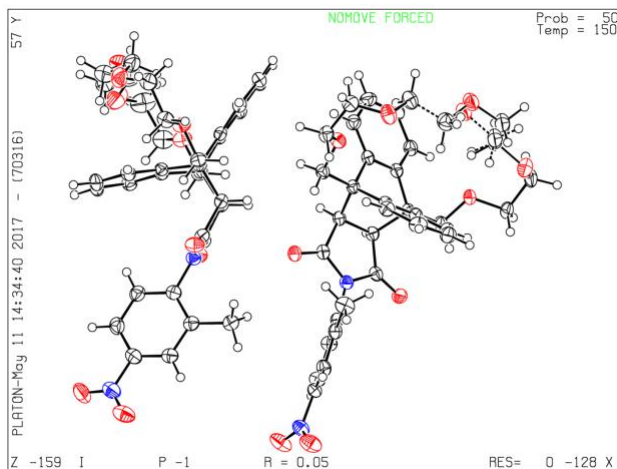

Bond precision: C-C = 0.0024 Å Wavelength=1.54178

Cell: a=10.6256 (6) b=14.6830 (8) c=20.9217 (10)  
 alpha=110.478 (3) beta=90.035 (2) gamma=90.542 (2)

Temperature: 150 K

|                        | Calculated    | Reported      |
|------------------------|---------------|---------------|
| Volume                 | 3057.7 (3)    | 3057.7 (3)    |
| Space group            | P -1          | P -1          |
| Hall group             | -P 1          | -P 1          |
| Moiety formula         | C35 H36 N2 O9 | C35 H36 N2 O9 |
| Sum formula            | C35 H36 N2 O9 | C35 H36 N2 O9 |
| Mr                     | 628.66        | 628.66        |
| Dx, g cm <sup>-3</sup> | 1.366         | 1.366         |
| Z                      | 4             | 4             |
| Mu (mm <sup>-1</sup> ) | 0.818         | 0.818         |
| F000                   | 1328.0        | 1328.0        |
| F000'                  | 1332.37       |               |
| h, k, lmax             | 13, 18, 26    | 13, 17, 26    |
| Nref                   | 13347         | 12348         |
| Tmin, Tmax             | 0.872, 0.921  | 0.609, 0.754  |
| Tmin'                  | 0.870         |               |

Correction method= # Reported T Limits: Tmin=0.609 Tmax=0.754

AbsCorr = MULTI-SCAN

Data completeness= 0.925

Theta(max)= 80.121

R(reflections)= 0.0497 ( 9787)

wR2(reflections)= 0.1311 ( 12348)

S = 1.047

Npar= 838

## X-ray crystal structure of Balance 1<sub>s</sub> (CCDC number 2321755)

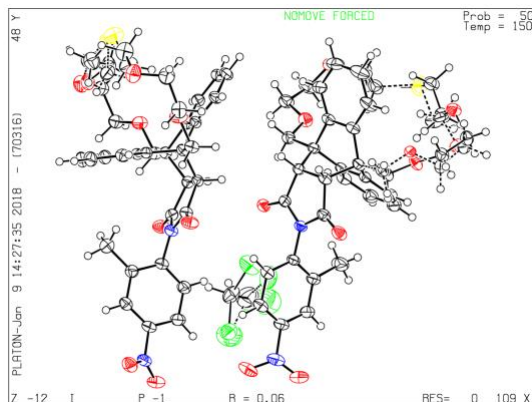

Bond precision: C-C = 0.0036 Å Wavelength=0.71073

Cell: a=10.0840(6) b=15.1221(8) c=22.3730(13)  
 alpha=100.593(2) beta=94.039(2) gamma=95.970(2)

Temperature: 150 K

|                        | Calculated                  | Reported                    |
|------------------------|-----------------------------|-----------------------------|
| Volume                 | 3321.3(3)                   | 3321.3(3)                   |
| Space group            | P -1                        | P -1                        |
| Hall group             | -P 1                        | -P 1                        |
| Moiety formula         | 2(C35 H36 N2 O8 S), C H Cl3 | 2(C35 H36 N2 O8 S), C H Cl3 |
| Sum formula            | C71 H73 Cl3 N4 O16 S2       | C71 H73 Cl3 N4 O16 S2       |
| Mr                     | 1408.80                     | 1408.80                     |
| Dx, g cm <sup>-3</sup> | 1.409                       | 1.409                       |
| Z                      | 2                           | 2                           |
| Mu (mm <sup>-1</sup> ) | 0.274                       | 0.274                       |
| F000                   | 1476.0                      | 1476.0                      |
| F000'                  | 1478.07                     |                             |
| h, k, lmax             | 14, 21, 32                  | 14, 21, 31                  |
| Nref                   | 20450                       | 29270                       |
| Tmin, Tmax             | 0.936, 0.970                | 0.635, 0.746                |
| Tmin'                  | 0.884                       |                             |

Correction method= # Reported T Limits: Tmin=0.635 Tmax=0.746

AbsCorr = MULTI-SCAN

Data completeness= 1.431

Theta(max)= 30.594

R(reflections)= 0.0552( 20258)

wR2(reflections)= 0.1584( 29270)

S = 1.043

Npar= 1004

## X-ray crystal structure of Balance C1 (CCDC number 2321756)

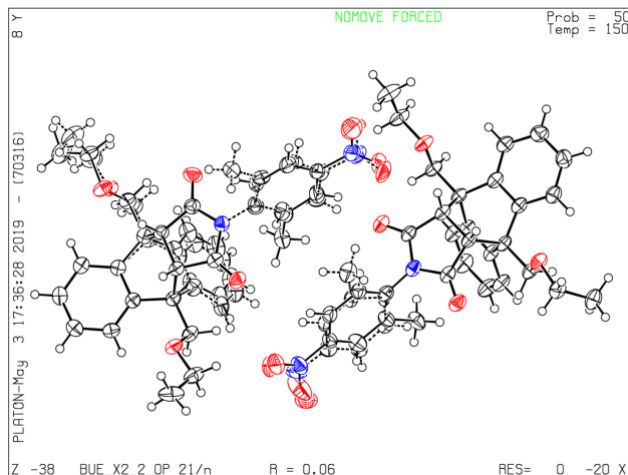

Bond precision: C-C = 0.0022 Å Wavelength=0.71073

Cell: a=17.0682(11) b=11.8271(7) c=27.346(3)  
 alpha=90 beta=106.721(4) gamma=90

Temperature: 150 K

|                        | Calculated    | Reported         |
|------------------------|---------------|------------------|
| Volume                 | 5286.9(8)     | 5286.9(7)        |
| Space group            | P 21/n        | P 21/n           |
| Hall group             | -P 2yn        | -P 2yn           |
| Moiety formula         | C31 H30 N2 O6 | ?                |
| Sum formula            | C31 H30 N2 O6 | C124 H120 N8 O24 |
| Mr                     | 526.57        | 2106.27          |
| Dx, g cm <sup>-3</sup> | 1.323         | 1.323            |
| Z                      | 8             | 2                |
| Mu (mm <sup>-1</sup> ) | 0.092         | 0.092            |
| F000                   | 2224.0        | 2224.0           |
| F000'                  | 2225.10       |                  |
| h, k, lmax             | 24, 16, 39    | 24, 16, 39       |
| Nref                   | 16186         | 15010            |
| Tmin, Tmax             | 0.951, 0.961  | 0.665, 0.746     |
| Tmin'                  | 0.951         |                  |

Correction method= # Reported T Limits: Tmin=0.665  
 Tmax=0.746 AbsCorr = MULTI-SCAN

Data completeness= 0.927 Theta(max)= 30.542

R(reflections)= 0.0566( 10258) wR2(reflections)= 0.1732( 15010)

S = 1.106 Npar= 995

## References

- (1) Kannan, A.; Rajakumar, P. *RSC Advances* **2015**, *5*, 73951.
- (2) Emenike, B. U.; Sevimler, A.; Farshadmand, A.; Roman, A. J. *Physical Chemistry Chemical Physics* **2023**, *25*, 17808.

8.551  
8.534  
8.527  
8.519  
8.510  
8.502  
8.478  
7.605  
7.588  
7.581  
7.573  
7.564  
7.556  
7.550  
7.531  
7.289  
5.638  
5.588  
5.539  
4.159  
4.141  
3.640  
3.628  
3.601  
3.590  
3.579  
3.551  
3.540  
3.429  
3.419  
3.391  
3.380  
3.370  
3.341  
3.330  
3.070  
3.056  
3.033  
3.020  
3.007  
2.970  
2.806  
2.793  
2.770  
2.756  
2.744  
2.720  
2.706

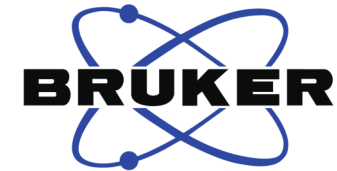

Current Data Parameters  
NAME anthracenyl-tetraethylene-crown-ether  
EXPNO 1  
PROCNO 1

F2 - Acquisition Parameters  
Date\_ 20170103  
Time 10.48  
INSTRUM spect  
PROBHD 5 mm PABBO BB-  
PULPROG zg30  
TD 65536  
SOLVENT CDCl3  
NS 16  
DS 2  
SWH 8223.685 Hz  
FIDRES 0.125483 Hz  
AQ 3.9845889 sec  
RG 50.8  
DM 60.800 usec  
DE 6.00 usec  
TE 295.2 K  
D1 1.00000000 sec  
TD0 1

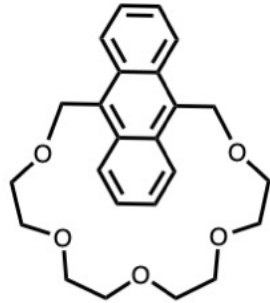

proton NMR spectrum  
400 MHz, chloroform-d

===== CHANNEL f1 =====  
NUC1 1H  
P1 9.30 usec  
PL1 0 dB  
SFO1 400.1324710 MHz  
  
F2 - Processing parameters  
SI 32768  
SF 400.1300000 MHz  
WDW EM  
SSB 0  
LB 0.30 Hz  
GB 0  
PC 1.00

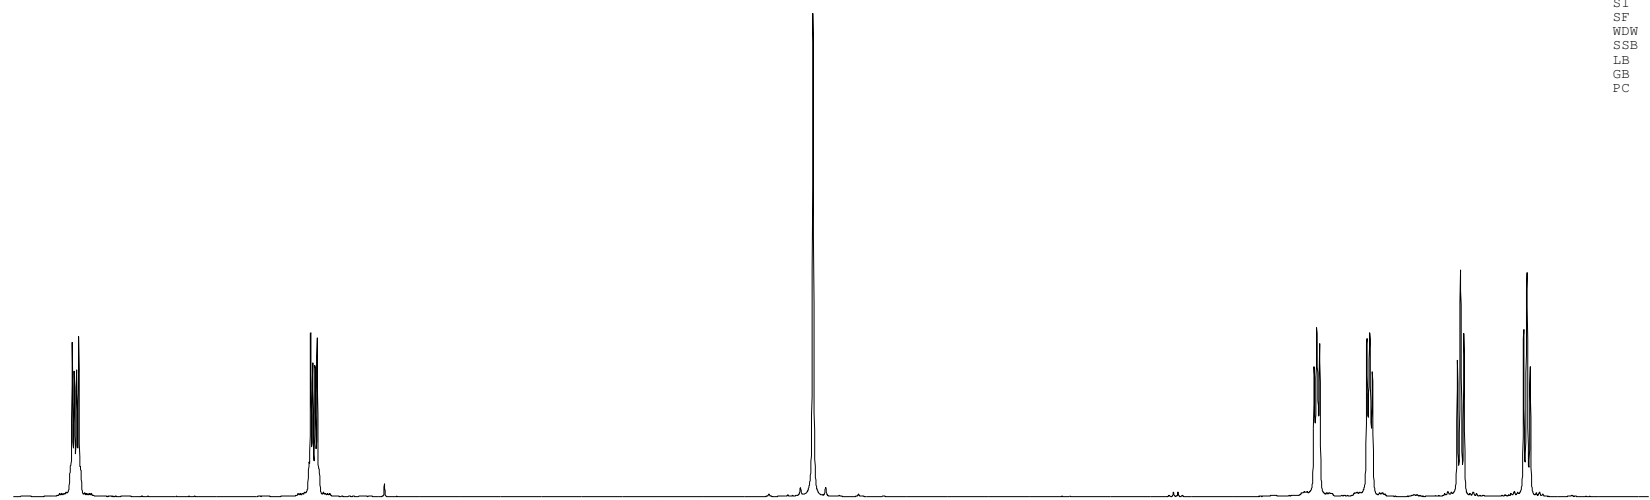

8.5 8.0 7.5 7.0 6.5 6.0 5.5 5.0 4.5 4.0 3.5 3.0 ppm

4.00 3.99 3.99 4.06 4.01 4.00 4.02

130.73  
130.60  
125.54  
125.22

77.46  
77.14  
76.83  
70.07  
70.02  
69.84  
68.96  
64.16

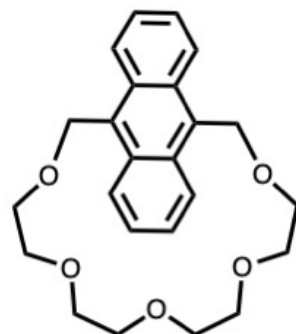

carbon NMR spectrum  
400 MHz, chloroform-d

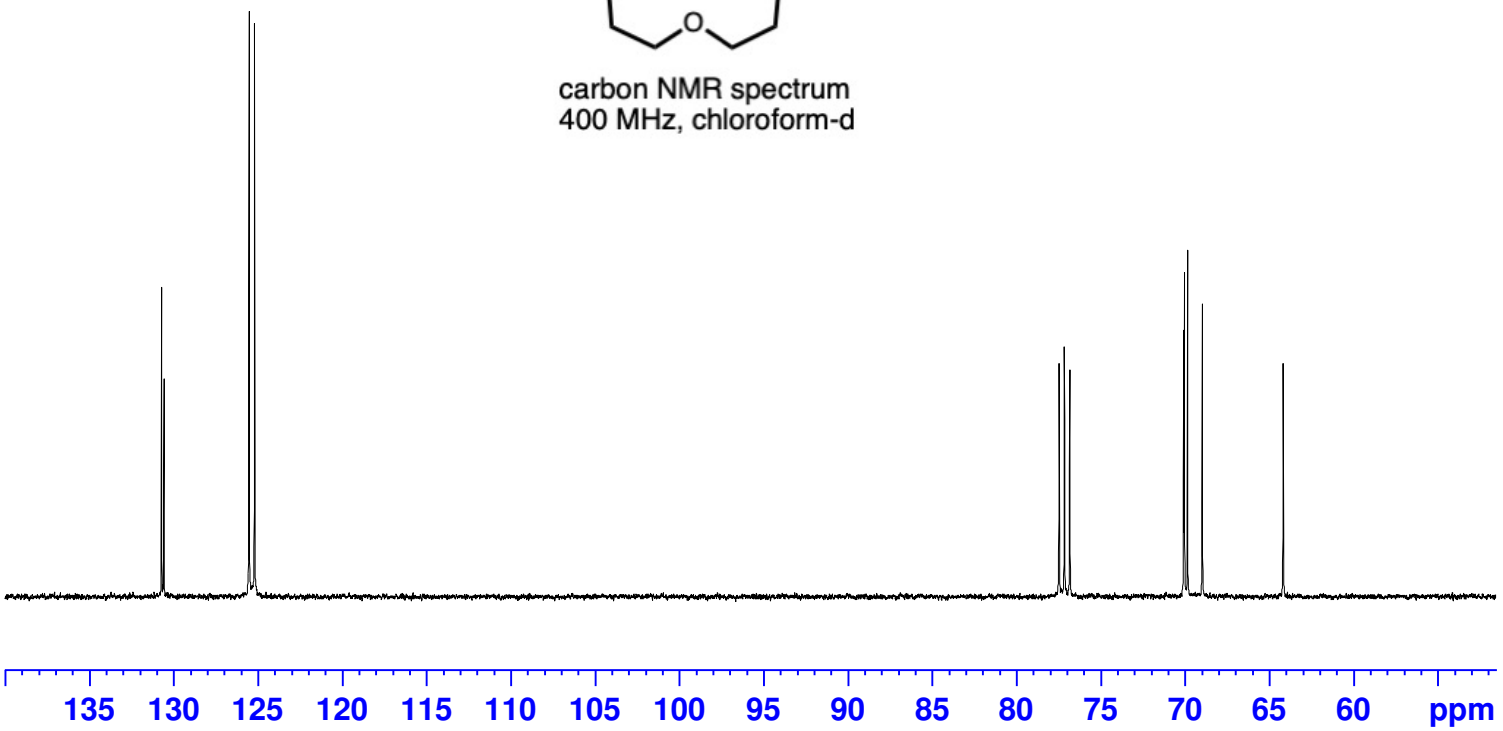

```
Current Data Parameters
NAME anthracenyl-tetraethylene-crown-ether-carbon
EXPNO 1
PROCNO 1

F2 - Acquisition Parameters
Date_ 20170103
Time 11.01
INSTRUM spect
PROBHD 5 mm PABBO BB-
PULPROG zgpg30
TD 65536
SOLVENT CDCl3
NS 150
DS 4
SWH 24038.461 Hz
FIDRES 0.366798 Hz
AQ 1.3631488 sec
RG 32768
DW 20.800 usec
DE 6.00 usec
TE 295.4 K
D1 2.0000000 sec
d11 0.0300000 sec
DELTA 1.8999998 sec
TD0 1

===== CHANNEL f1 =====
NUC1 13C
P1 7.30 usec
PL1 0 dB
SFO1 100.6228298 MHz

===== CHANNEL f2 =====
CPDPRG2 waltz16
NUC2 1H
PCPD2 80.00 usec
PL2 0 dB
PL12 20.00 dB
PL13 22.00 dB
SFO2 400.1316005 MHz

F2 - Processing parameters
SI 32768
SF 100.6127690 MHz
WDW EM
SSB 0
LB 1.00 Hz
GB 0
PC 1.40
```

8.532  
8.524  
8.515  
8.507

7.595  
7.587  
7.578  
7.570

— 5.612

3.719  
3.708  
3.696  
3.566  
3.554  
3.544  
3.270  
3.260  
3.257  
3.248  
3.229  
3.222  
3.218  
3.209  
2.949

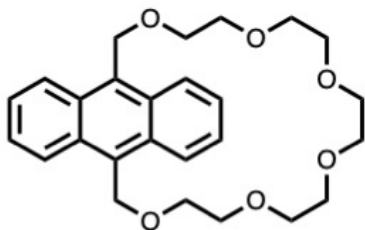

proton NMR spectrum  
400 MHz, chloroform-d

Current Data Parameters  
NAME 18-Crown-6-anthrenyl ether  
EXPNO 1  
PROCNO 1

F2 - Acquisition Parameters  
Date\_ 20181008  
Time 13.44  
INSTRUM spect  
PROBHD 5 mm PABBO BB-  
PULPROG zg30  
TD 65536  
SOLVENT CDCl3  
NS 9  
DS 2  
SWH 8012.820 Hz  
FIDRES 0.122266 Hz  
AQ 4.0894465 sec  
RG 287  
DW 62.400 usec  
DE 6.50 usec  
TE 298.0 K  
D1 1.00000000 sec  
TD0 1

==== CHANNEL f1 =====  
SFO1 400.1324710 MHz  
NUC1 1H  
P1 9.30 usec  
PLW1 18.00000000 W

F2 - Processing parameters  
SI 65536  
SF 400.1300000 MHz  
WDW EM  
SSB 0  
LB 0.30 Hz  
GB 0  
PC 1.00

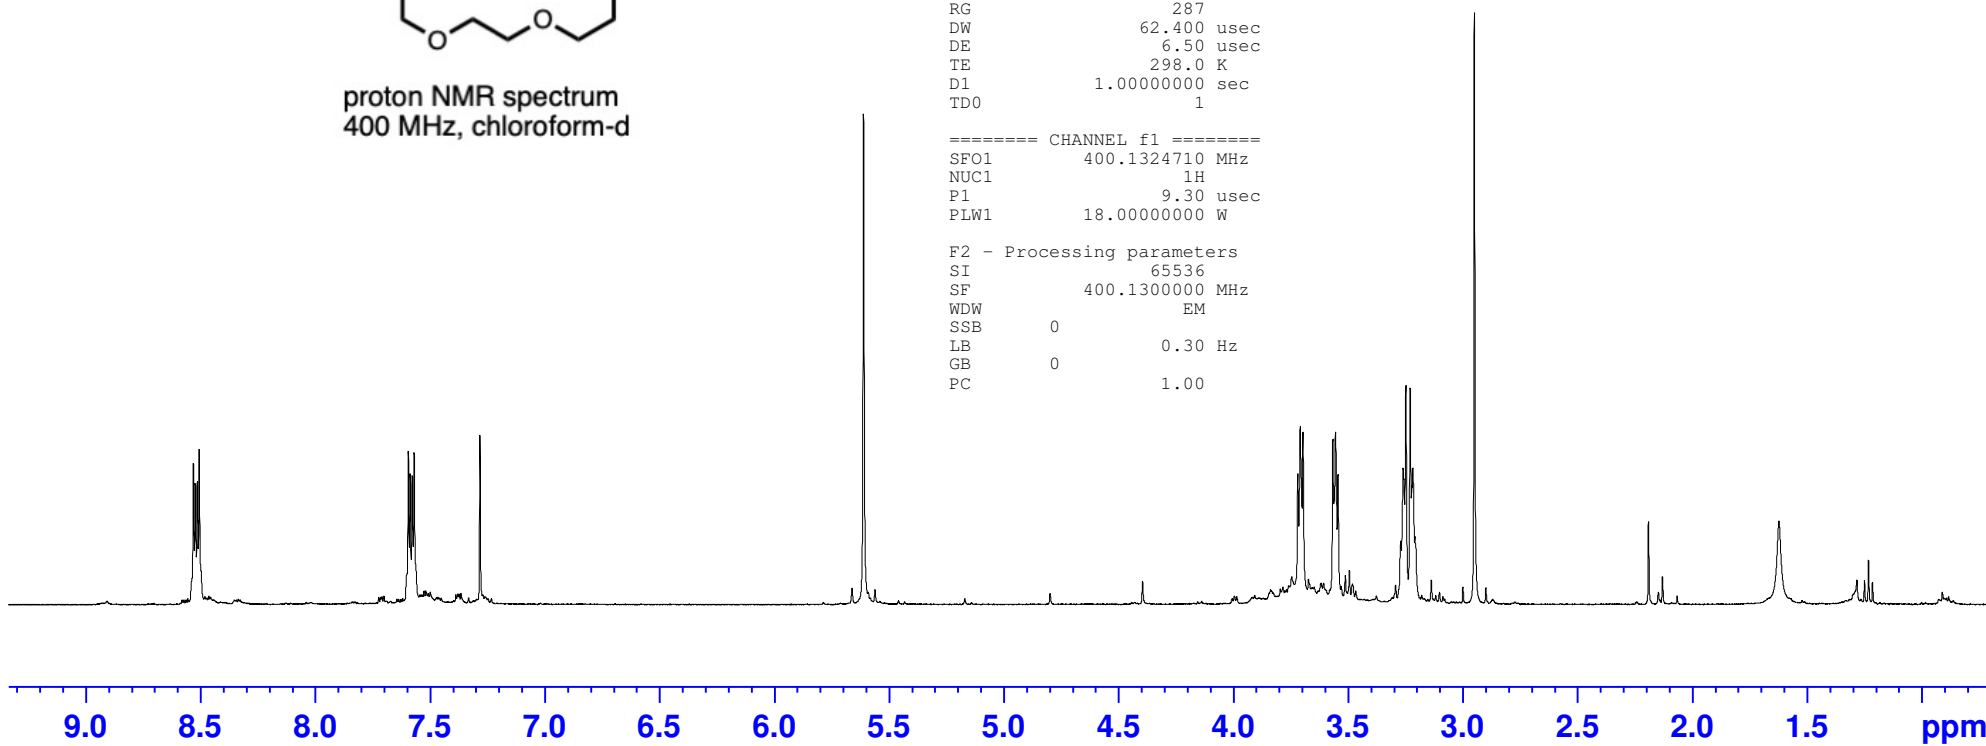

9.0 8.5 8.0 7.5 7.0 6.5 6.0 5.5 5.0 4.5 4.0 3.5 3.0 2.5 2.0 1.5 ppm



130.68  
130.53

125.66  
125.17

70.56  
70.28  
70.12  
69.70  
69.15

64.78

```
Current Data Parameters
NAME ether-crown-anthracene
EXPNO 1
PROCNO 1

F2 - Acquisition Parameters
Date_ 20161117
Time 11.04
INSTRUM spect
PROBHD 5 mm PABBO BB-
PULPROG zgpg30
TD 65536
SOLVENT CDCl3
NS 15000
DS 4
SWH 24038.461 Hz
FIDRES 0.366798 Hz
AQ 1.3631488 sec
RG 575
EW 20.800 usec
DE 6.00 usec
TE 295.9 K
D1 2.00000000 sec
d11 0.03000000 sec
DELTA 1.89999998 sec
TDO 1

===== CHANNEL f1 =====
NUC1 13C
P1 7.30 usec
PL1 0 dB
SFO1 100.6228298 MHz

===== CHANNEL f2 =====
CPDPRG[2] waltz16
NUC2 1H
PCPD2 80.00 usec
PL2 0 dB
PL12 20.00 dB
PL13 22.00 dB
SFO2 400.1316005 MHz

F2 - Processing parameters
SI 32768
SF 100.6127690 MHz
WDW EM
SSB 0
LB 1.00 Hz
GB 0
PC 1.40
```

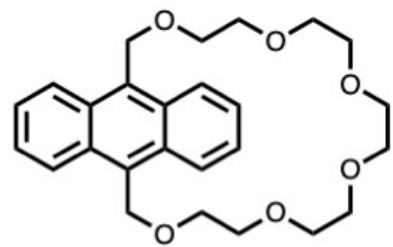

carbon NMR spectrum  
400 MHz, chloroform-d

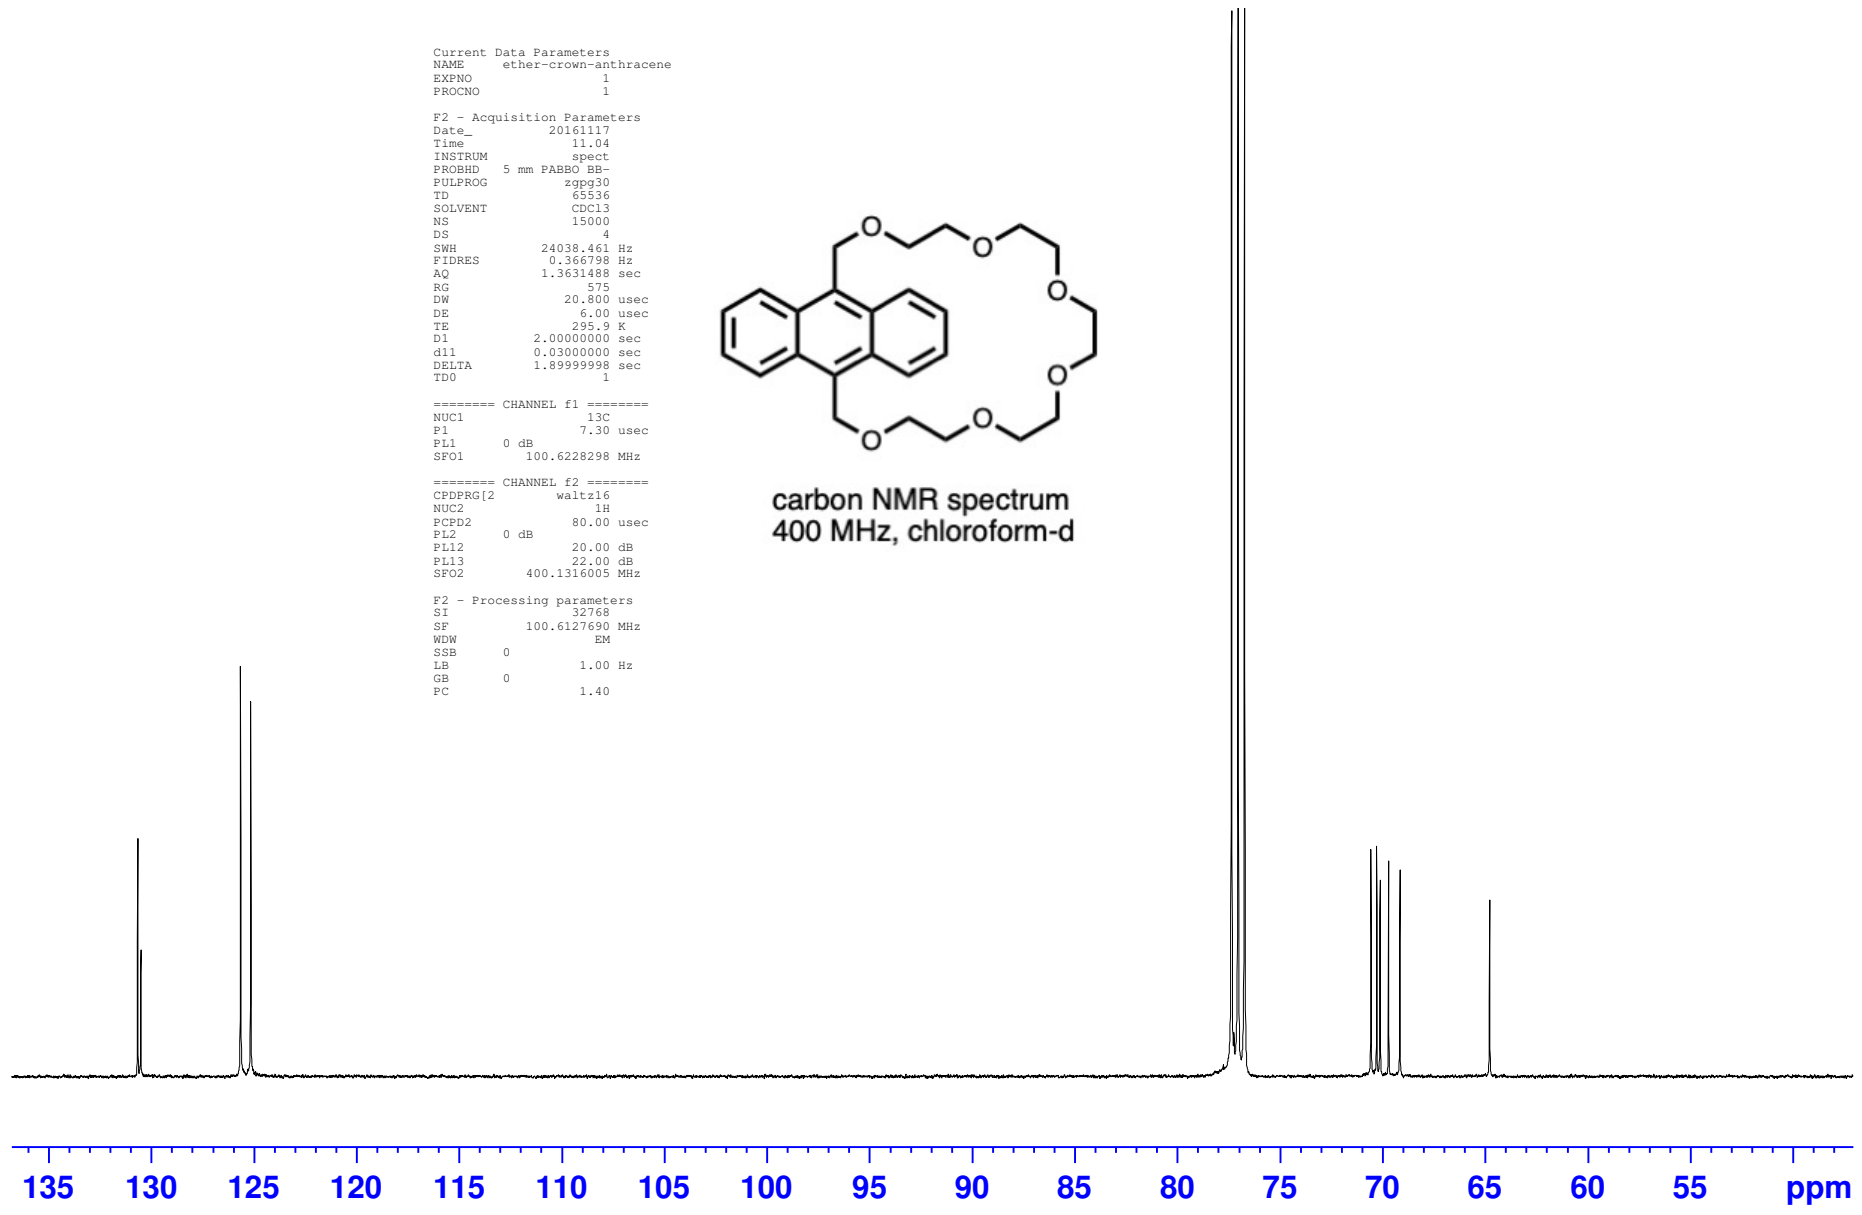

8.521  
8.513  
8.504  
8.495

7.590  
7.582  
7.573  
7.564

5.590  
3.790  
3.780  
3.775  
3.768  
3.666  
3.659  
3.654  
3.644  
3.454  
3.444  
3.437  
3.431  
3.388  
3.381  
3.375  
3.368  
3.359  
3.210  
3.207  
3.200  
3.192  
3.186  
3.161  
3.153  
3.146  
3.138  
3.135

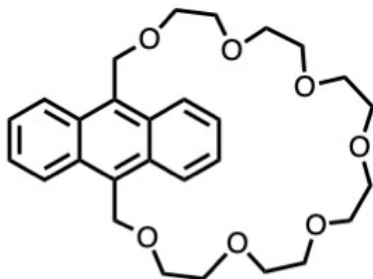

proton NMR spectrum  
400 MHz, chloroform-d

Current Data Parameters  
NAME 7-membered-anthracene  
EXPNO 1  
PROCNO 1

F2 - Acquisition Parameters  
Date\_ 20170718  
Time 17.58  
INSTRUM spect  
PROBHD 5 mm PABBO BB-  
PULPROG zg30  
TD 65536  
SOLVENT CDCl3  
NS 16  
DS 2  
SWH 8223.685 Hz  
FIDRES 0.125483 Hz  
AQ 3.9845889 sec  
RG 128  
DW 60.800 usec  
DE 6.00 usec  
TE 296.5 K  
D1 1.00000000 sec  
TD0 1

===== CHANNEL f1 =====  
NUC1 1H  
P1 9.30 usec  
PL1 0 dB  
SF01 400.1324710 MHz

F2 - Processing parameters  
SI 32768  
SF 400.1300000 MHz  
WDW EM  
SSB 0  
LB 0.30 Hz  
GB 0  
PC 1.00

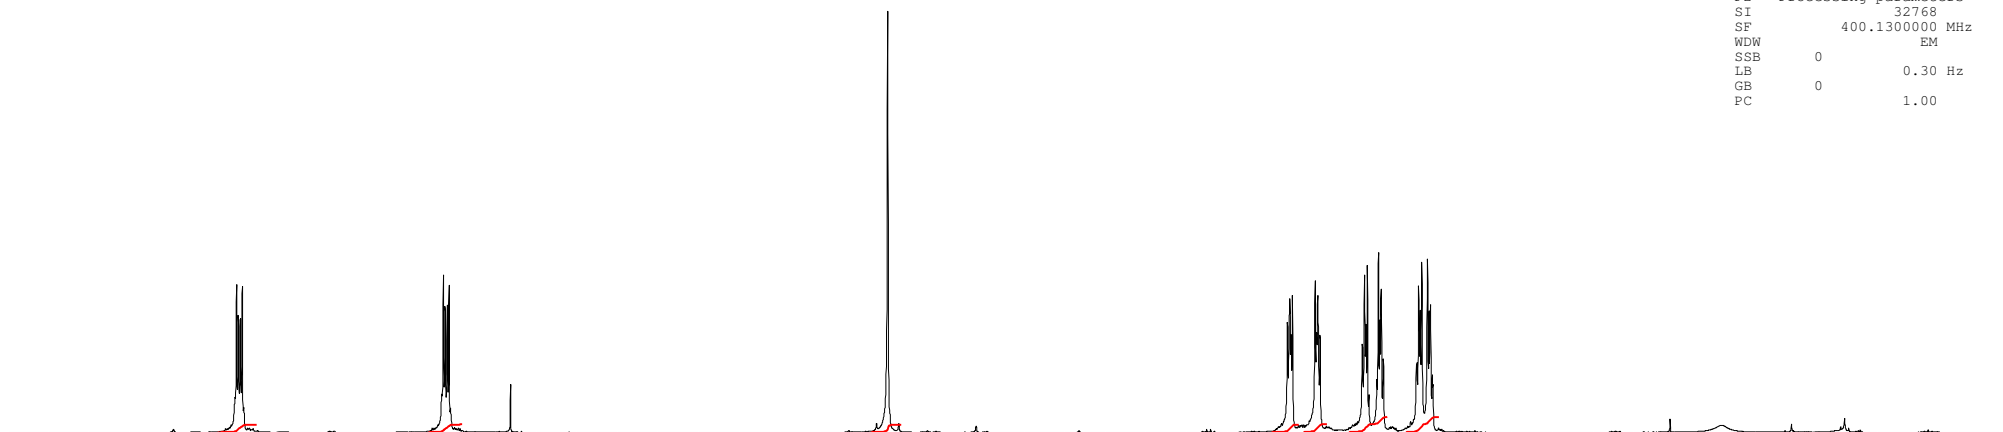

9.0 8.5 8.0 7.5 7.0 6.5 6.0 5.5 5.0 4.5 4.0 3.5 3.0 2.5 2.0 1.5 ppm

2.01

2.06

2.00

2.04

2.16

4.09

4.03

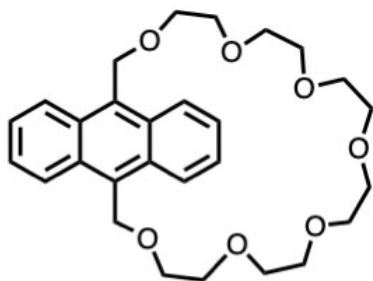

carbon NMR spectrum  
400 MHz, chloroform-d

130.71  
130.50  
125.67  
125.14

70.77  
70.61  
70.38  
70.36  
70.28  
69.66  
65.20

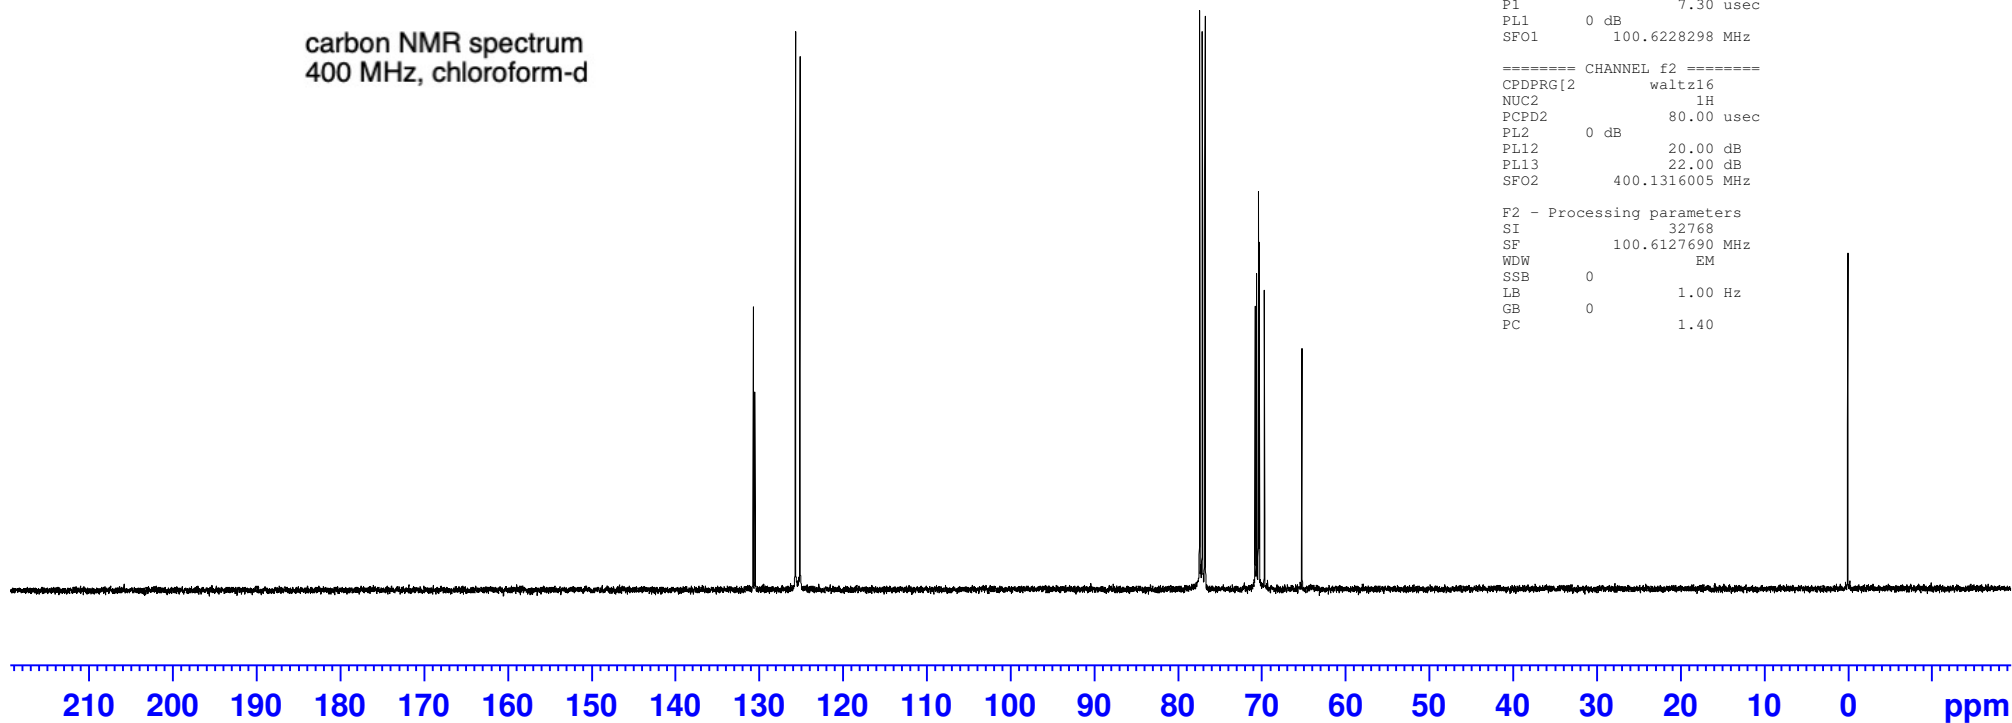

Current Data Parameters  
NAME 7-membered-anthracene-carbon  
EXPNO 1  
PROCNO 1

F2 - Acquisition Parameters  
Date\_ 20170718  
Time 19.01  
INSTRUM spect  
PROBHD 5 mm PABBO BB-  
PULPROG zgpg30  
TD 65536  
SOLVENT CDCl3  
NS 1024  
DS 4  
SWH 24038.461 Hz  
FIDRES 0.366798 Hz  
AQ 1.3631488 sec  
RG 575  
DW 20.800 usec  
DE 6.00 usec  
TE 297.0 K  
D1 2.00000000 sec  
d11 0.03000000 sec  
DELTA 1.89999998 sec  
TD0 1

===== CHANNEL f1 =====  
NUC1 13C  
P1 7.30 usec  
PL1 0 dB  
SFO1 100.6228298 MHz

===== CHANNEL f2 =====  
CPDPRG[2] waltz16  
NUC2 1H  
PCPD2 80.00 usec  
PL2 0 dB  
PL12 20.00 dB  
PL13 22.00 dB  
SFO2 400.1316005 MHz

F2 - Processing parameters  
SI 32768  
SF 100.6127690 MHz  
WDW EM  
SSB 0  
LB 1.00 Hz  
GB 0  
PC 1.40

130.77  
130.68  
128.75  
128.00  
126.68  
125.64  
125.23

77.42  
77.10  
76.79  
69.84  
68.79  
68.76  
64.50  
59.50  
53.46

Current Data Parameters  
NAME Aza-tetraethylene-glycol-anthracene-carbon  
EXPNO 1  
PROCNO 1

F2 - Acquisition Parameters  
Date\_ 20190116  
Time 14.49  
INSTRUM spect  
PROBHD 5 mm FAPBO BB-  
FULPROG zgpg30  
TD 65536  
SOLVENT CDCl3  
NS 228  
DS 4  
SWH 24038.461 Hz  
FIDRES 0.366798 Hz  
AQ 1.3631488 sec  
RG 2050  
DW 20.800 usec  
DE 6.50 usec  
TE 300.0 K  
D1 2.00000000 sec  
D11 0.03000000 sec  
TDO 1

===== CHANNEL f1 =====  
SFO1 100.6218241 MHz  
NUC1 13C  
P1 7.50 usec  
PLW1 75.00000000 W

===== CHANNEL f2 =====  
SFO2 400.1316005 MHz  
NUC2 1H  
CPDPRG[2] waltz16  
PCPD2 90.00 usec  
PLW2 18.00000000 W  
PLW12 0.19220001 W  
PLW13 0.09667500 W

F2 - Processing parameters  
SI 32768  
SF 100.6127690 MHz  
WDW EM  
SSB 0  
LB 1.00 Hz  
GB 0  
PC 1.40

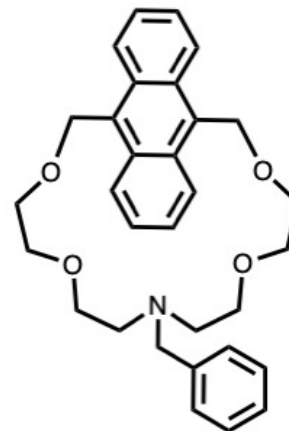

carbon NMR spectrum  
400 MHz, chloroform-d

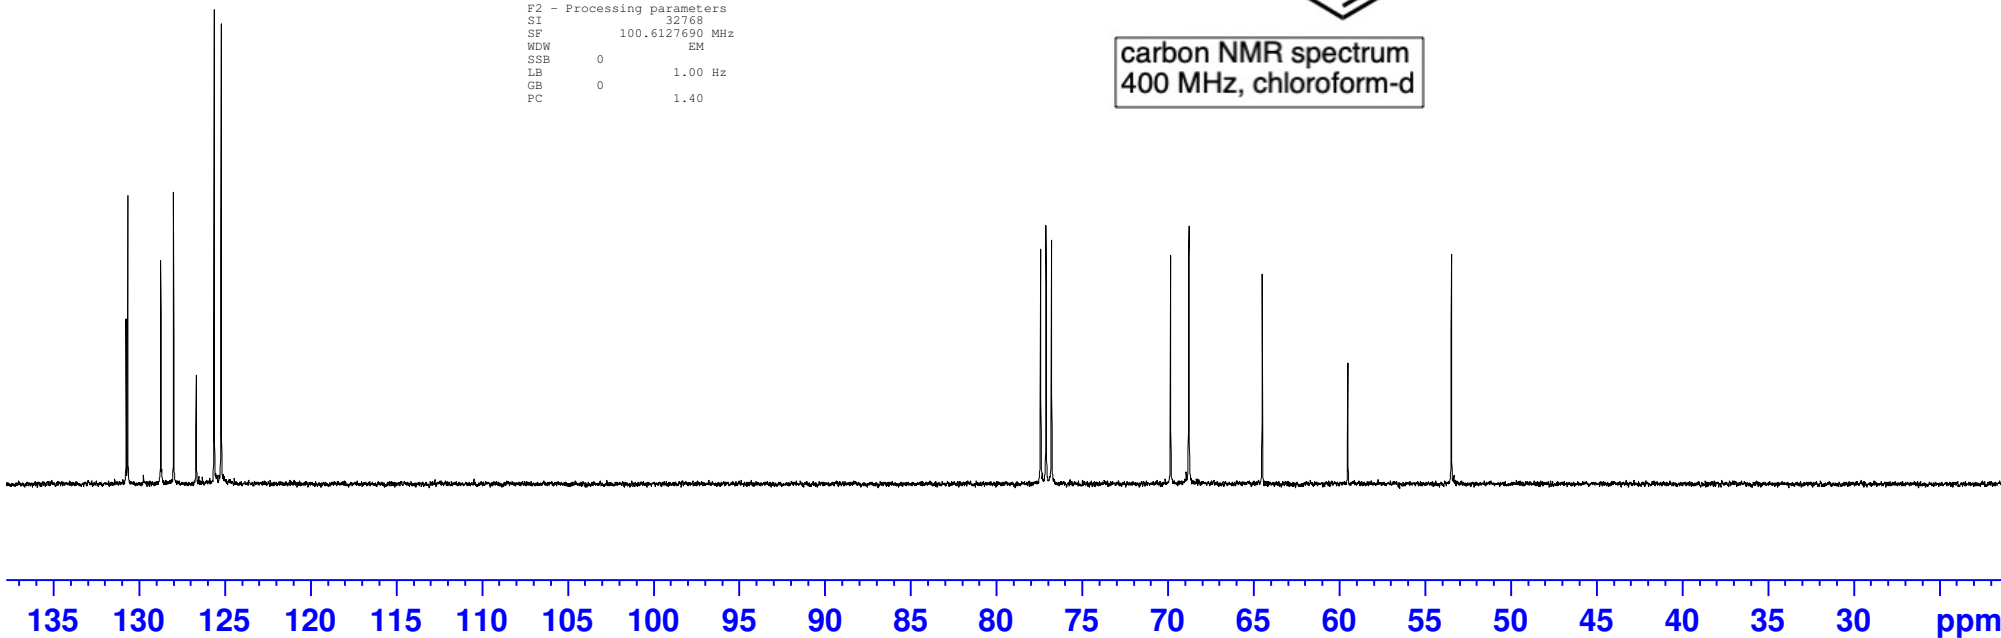

8.562  
8.554  
8.545  
8.537  
7.601  
7.593  
7.584  
7.576  
7.238  
7.234  
7.220  
7.207  
7.190  
7.136  
7.132  
7.116

— 5.629

3.621  
3.610  
3.599  
3.321  
3.314  
3.303  
3.292  
2.822  
2.805  
2.789

1.911  
1.894  
1.877

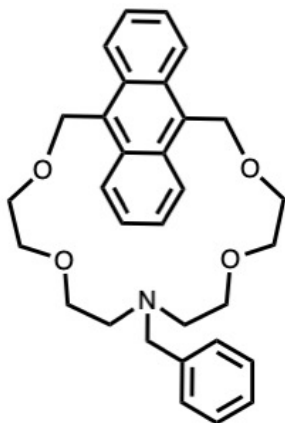

proton NMR spectrum  
400 MHz, chloroform-d

Current Data Parameters  
NAME Aza-tetraethylene-glycol-anthracene  
EXPNO 1  
PROCNO 1

F2 - Acquisition Parameters  
Date\_ 20190116  
Time 14.30  
INSTRUM spect  
PROBHD 5 mm PABBO BB-  
PULPROG zg30  
TD 65536  
SOLVENT CDCl3  
NS 6  
DS 2  
SWH 8012.820 Hz  
FIDRES 0.122266 Hz  
AQ 4.0894465 sec  
RG 80.6  
DW 62.400 usec  
DE 6.50 usec  
TE 298.0 K  
D1 1.00000000 sec  
TDO 1

===== CHANNEL f1 =====  
SF01 400.1324710 MHz  
NUC1 1H  
P1 9.30 usec  
PLW1 18.00000000 W

F2 - Processing parameters  
SI 65536  
SF 400.1300000 MHz  
WDW EM  
SSB 0  
LB 0.30 Hz  
GB 0  
PC 1.00

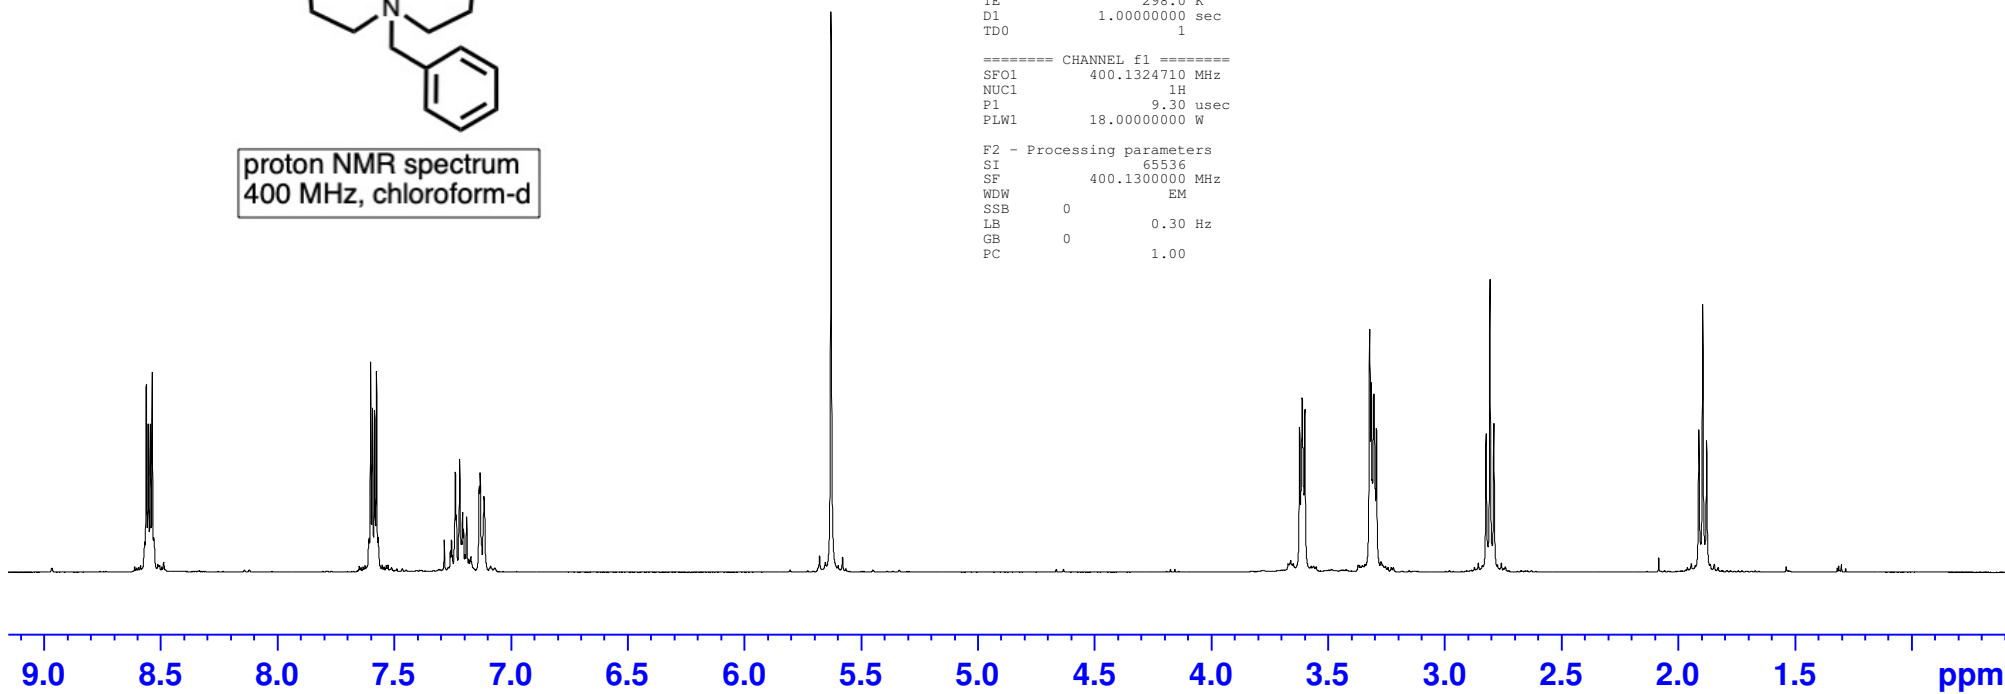

3.81

3.86

2.97

1.84

3.84

4.00

5.79

3.82

3.72

130.82  
130.63  
125.69  
125.21

70.74  
69.84  
69.75  
64.73

31.51

```
Current Data Parameters
NAME      thio-tetraethylene-glycoll-anthracene-carbon
EXPNO     1
PROCNO    1

F2 - Acquisition Parameters
Date_     20191025
Time      20.25
INSTRUM   spect
PROBHD    5 mm PABBO BB-
PULPROG   zgpg30
TD         65536
SOLVENT   CDCl3
NS         564
DS         4
SWH        24038.461 Hz
FIDRES     0.366798 Hz
AQ         1.3631488 sec
RG         2050
DW         20.800 usec
DE         6.50 usec
TE         300.0 K
D1         2.00000000 sec
D11        0.03000000 sec
TD0        1

===== CHANNEL f1 =====
SFO1      100.6218241 MHz
NUC1      13C
P1         7.50 usec
PLW1      75.00000000 W

===== CHANNEL f2 =====
SFO2      400.1316005 MHz
NUC2      1H
CPDPRG[2] waltz16
PCPD2     90.00 usec
PLW2      18.00000000 W
PLW12     0.19220001 W
PLW13     0.09667500 W

F2 - Processing parameters
SI         32768
SF         100.6127690 MHz
WDW        EM
SSB        0
LB         1.00 Hz
GB         0
PC         1.40
```

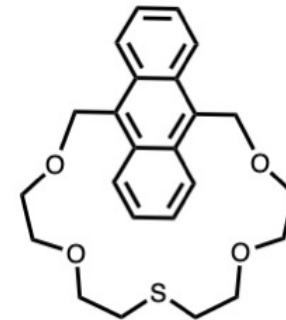

carbon NMR spectrum  
400 MHz, chloroform-d

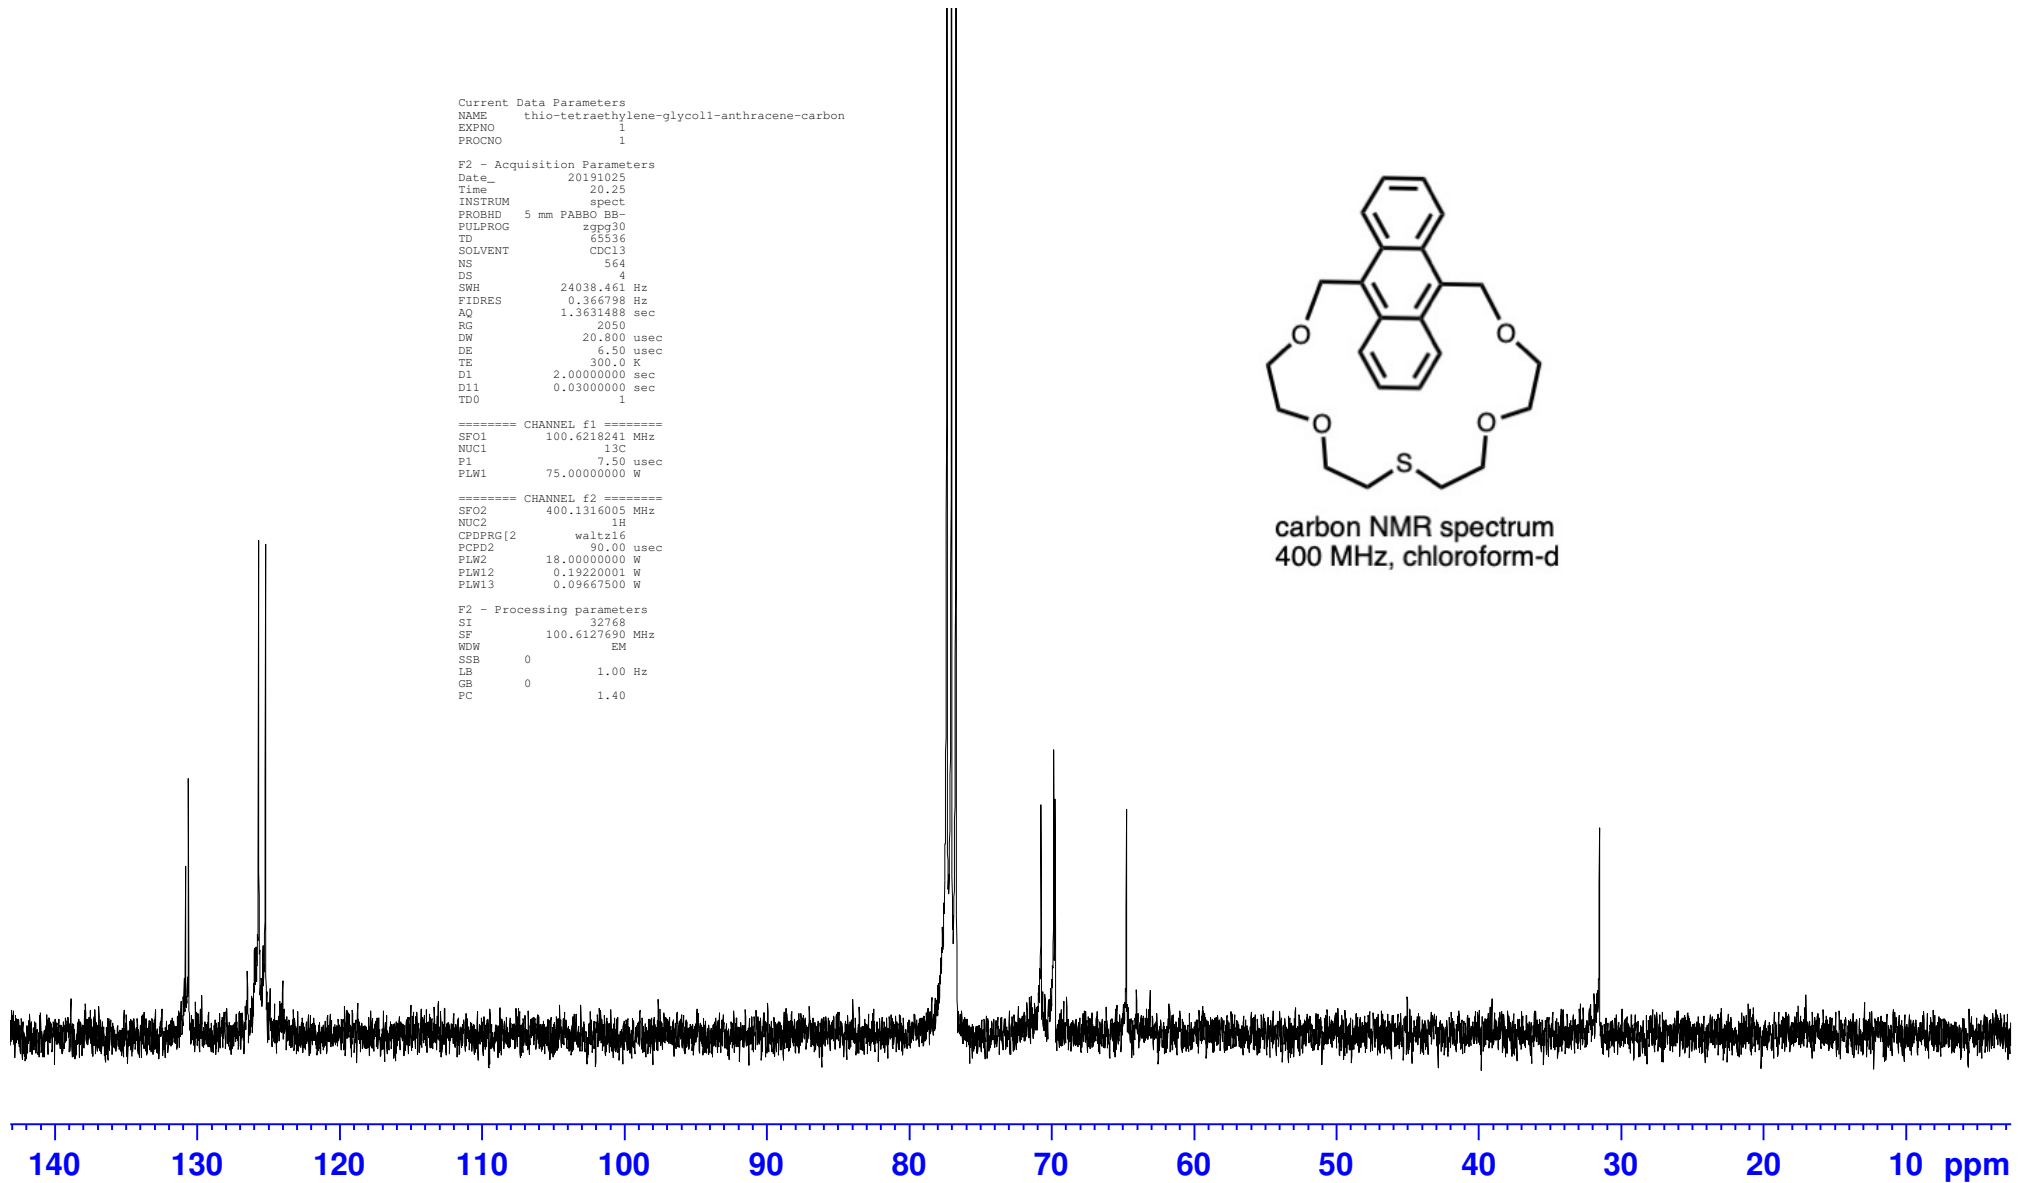

8.557  
8.549  
8.540  
8.531

7.618  
7.611  
7.603  
7.594  
7.586

— 5.644

3.704  
3.693  
3.682  
3.352  
3.341  
3.330  
2.995  
2.978  
2.959

1.910  
1.892  
1.874

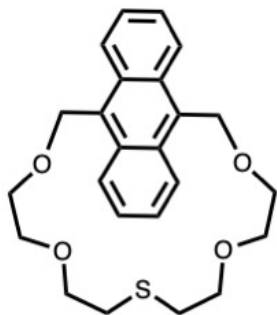

proton NMR spectrum  
400 MHz, chloroform-d

Current Data Parameters  
NAME thio-tetraethylene-glycoll-anthracene  
EXPNO 1  
PROCNO 1

F2 - Acquisition Parameters  
Date\_ 20191025  
Time 19.45  
INSTRUM spect  
PROBHD 5 mm PABBO BB-  
PULPROG zg30  
TD 65536  
SOLVENT CDCl3  
NS 3  
DS 2  
SWH 8012.820 Hz  
FIDRES 0.122266 Hz  
AQ 4.0894465 sec  
RG 256  
DW 62.400 usec  
DE 6.50 usec  
TE 298.0 K  
D1 1.00000000 sec  
TD0 1

===== CHANNEL f1 =====  
SFO1 400.1324710 MHz  
NUC1 1H  
P1 9.30 usec  
PLW1 18.00000000 W

F2 - Processing parameters  
SI 65536  
SF 400.1300000 MHz  
WDW EM  
SSB 0  
LB 0.30 Hz  
GB 0  
PC 1.00

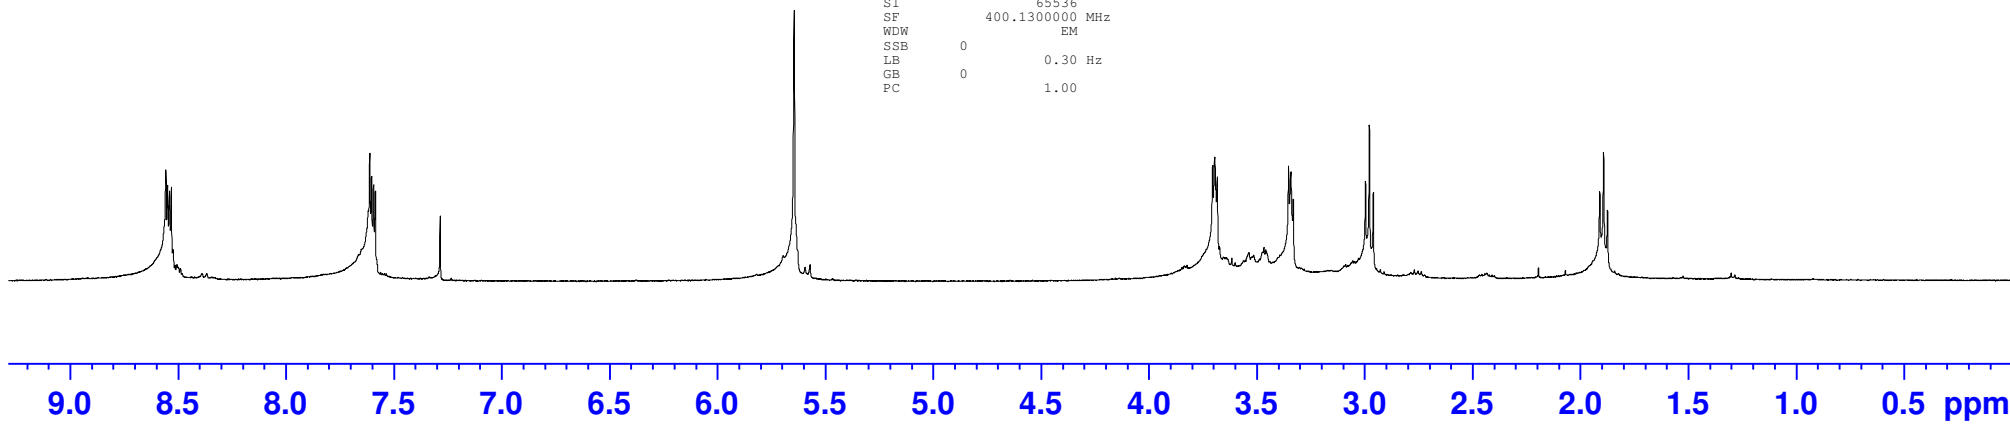

3.96

4.38

3.99

4.82

3.89

4.00

3.90

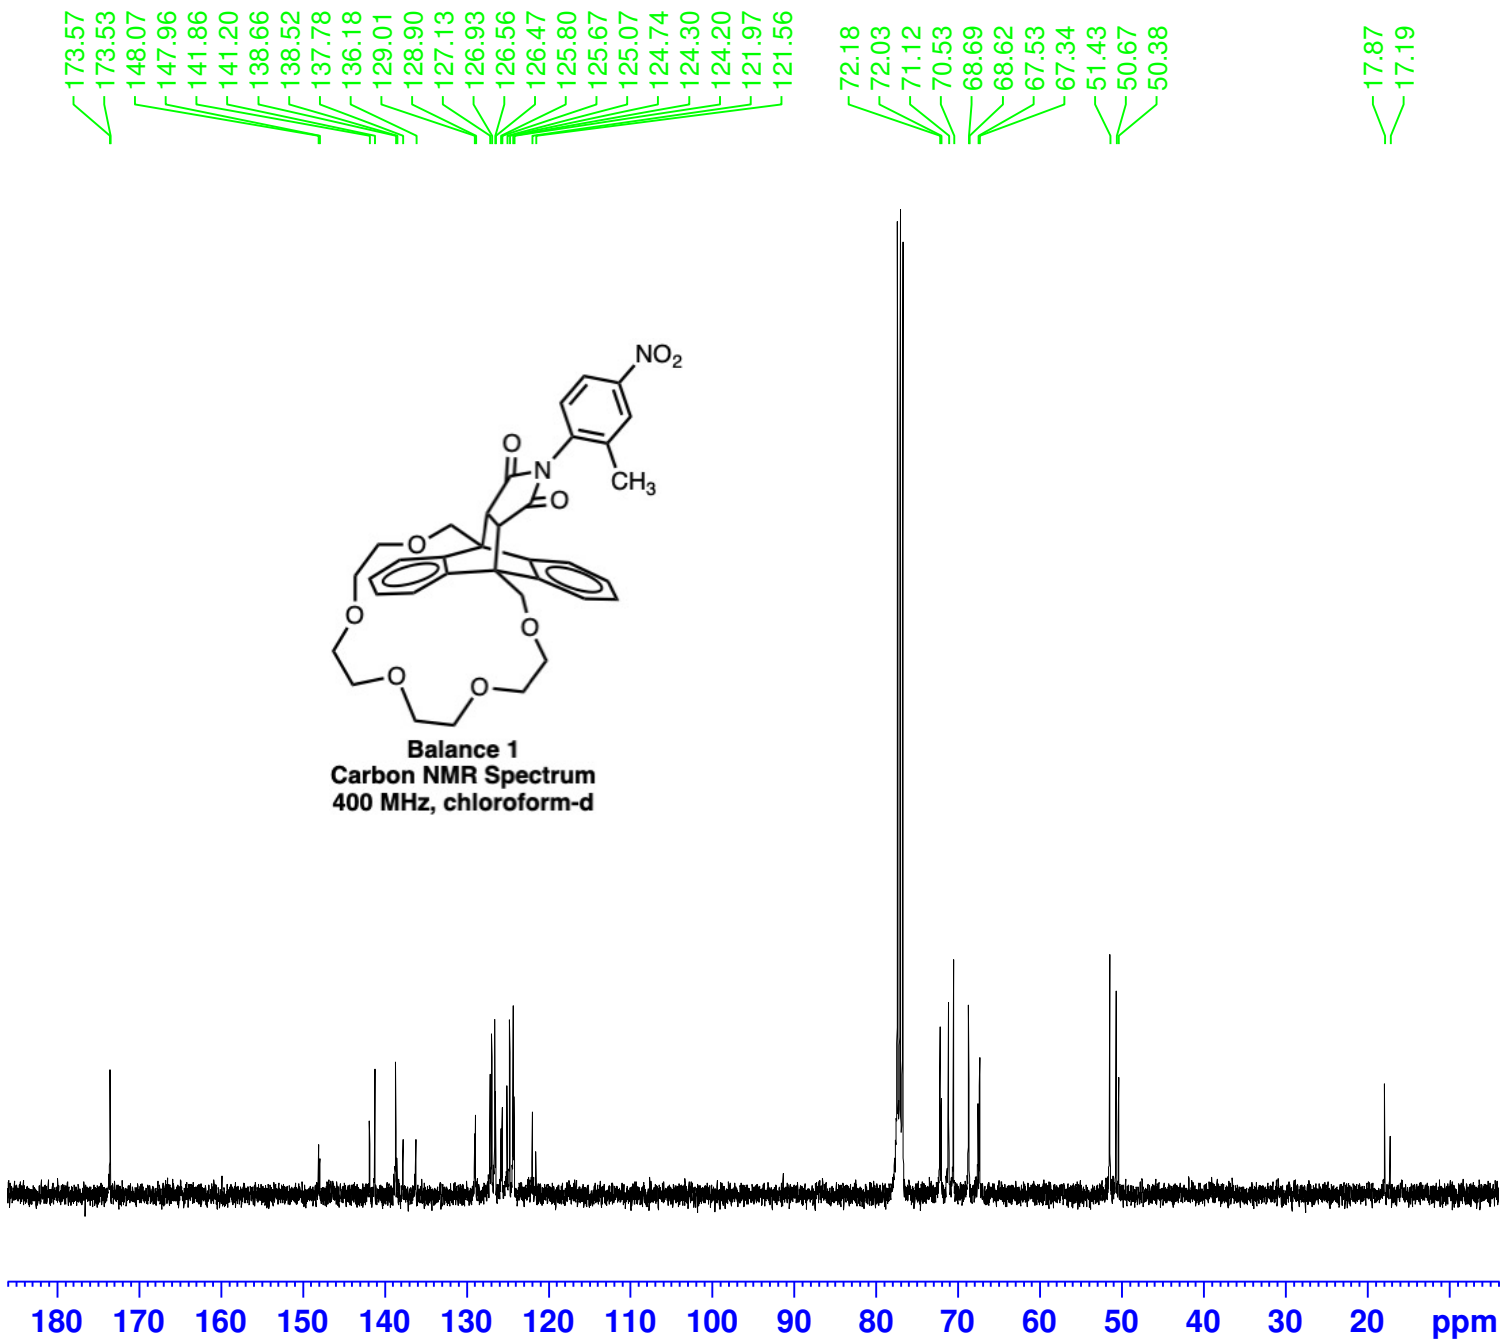

173.57  
 173.53  
 148.07  
 147.96  
 141.86  
 141.20  
 138.66  
 138.52  
 137.78  
 136.18  
 129.01  
 128.90  
 127.13  
 126.93  
 126.56  
 126.47  
 125.80  
 125.67  
 125.07  
 124.74  
 124.30  
 124.20  
 121.97  
 121.56

72.18  
 72.03  
 71.12  
 70.53  
 68.69  
 68.62  
 67.53  
 67.34  
 51.43  
 50.67  
 50.38

17.87  
 17.19

Current Data Parameters  
 NAME 15-C-5-No2-balance-carbon  
 EXPNO 1  
 PROCNO 1

F2 - Acquisition Parameters  
 Date\_ 20180718  
 Time\_ 21.08  
 INSTRUM spect  
 PROBHD 5 mm PABBO BB-  
 PULPROG zgpg30  
 TD 65536  
 SOLVENT CDCl3  
 NS 640  
 DS 4  
 SWH 24038.461 Hz  
 FIDRES 0.366798 Hz  
 AQ 1.3631488 sec  
 RG 2050  
 DW 20.800 usec  
 DE 6.50 usec  
 TE 300.0 K  
 D1 2.00000000 sec  
 D11 0.03000000 sec  
 TD0 1

===== CHANNEL f1 =====  
 SFO1 100.6218241 MHz  
 NUC1 13C  
 P1 7.50 usec  
 PLW1 75.00000000 W

===== CHANNEL f2 =====  
 SFO2 400.1316005 MHz  
 NUC2 1H  
 CPDPRG[2] waltz16  
 PCPD2 90.00 usec  
 PLW2 18.00000000 W  
 PLW12 0.19220001 W  
 PLW13 0.09667500 W

F2 - Processing parameters  
 SI 32768  
 SF 100.6127690 MHz  
 WDW EM  
 SSB 0  
 LB 1.00 Hz  
 GB 0  
 PC 1.40



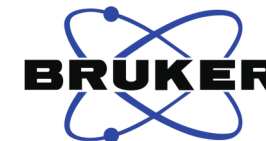

8.094  
8.088  
8.016  
7.770  
7.762  
7.756  
7.747  
7.601  
7.592  
7.586  
7.578  
7.480  
7.472  
7.466  
7.355  
7.347  
7.339  
7.332  
7.290  
5.765  
5.743  
5.096  
5.084  
5.070  
5.058  
4.770  
4.744  
3.991  
3.982  
3.974  
3.719  
3.695  
3.686  
3.630  
3.620  
3.146  
3.136  
3.017  
3.006  
3.003  
2.991  
2.978  
2.967  
2.121  
2.102  
2.085  
2.083  
1.612  
1.254

Current Data Parameters  
NAME balance-anthracenyl-15-c-5-nitro  
EXPNO 1  
PROCNO 1

F2 - Acquisition Parameters  
Date\_ 20170815  
Time 16.57  
INSTRUM spect  
PROBHD 5 mm PABBO BB-  
PULPROG zg30  
TD 65536  
SOLVENT CDCl3  
NS 6  
DS 2  
SWH 8223.685 Hz  
FIDRES 0.125483 Hz  
AQ 3.9845889 sec  
RG 287  
DW 60.800 usec  
DE 6.00 usec  
TE 296.5 K  
D1 1.00000000 sec  
TD0 1

===== CHANNEL f1 =====  
NUC1 1H  
P1 9.30 usec  
PL1 0 dB  
SFO1 400.1324710 MHz

F2 - Processing parameters  
SI 32768  
SF 400.1300000 MHz  
WDW EM  
SSB 0  
LB 0.30 Hz  
GB 0  
PC 1.00

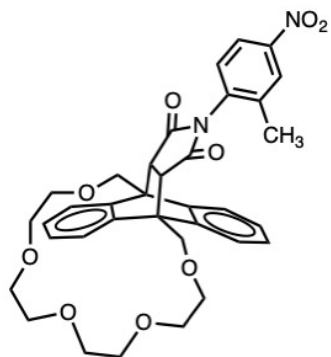

Balance 1  
Proton NMR Spectrum  
400 MHz, chloroform-d

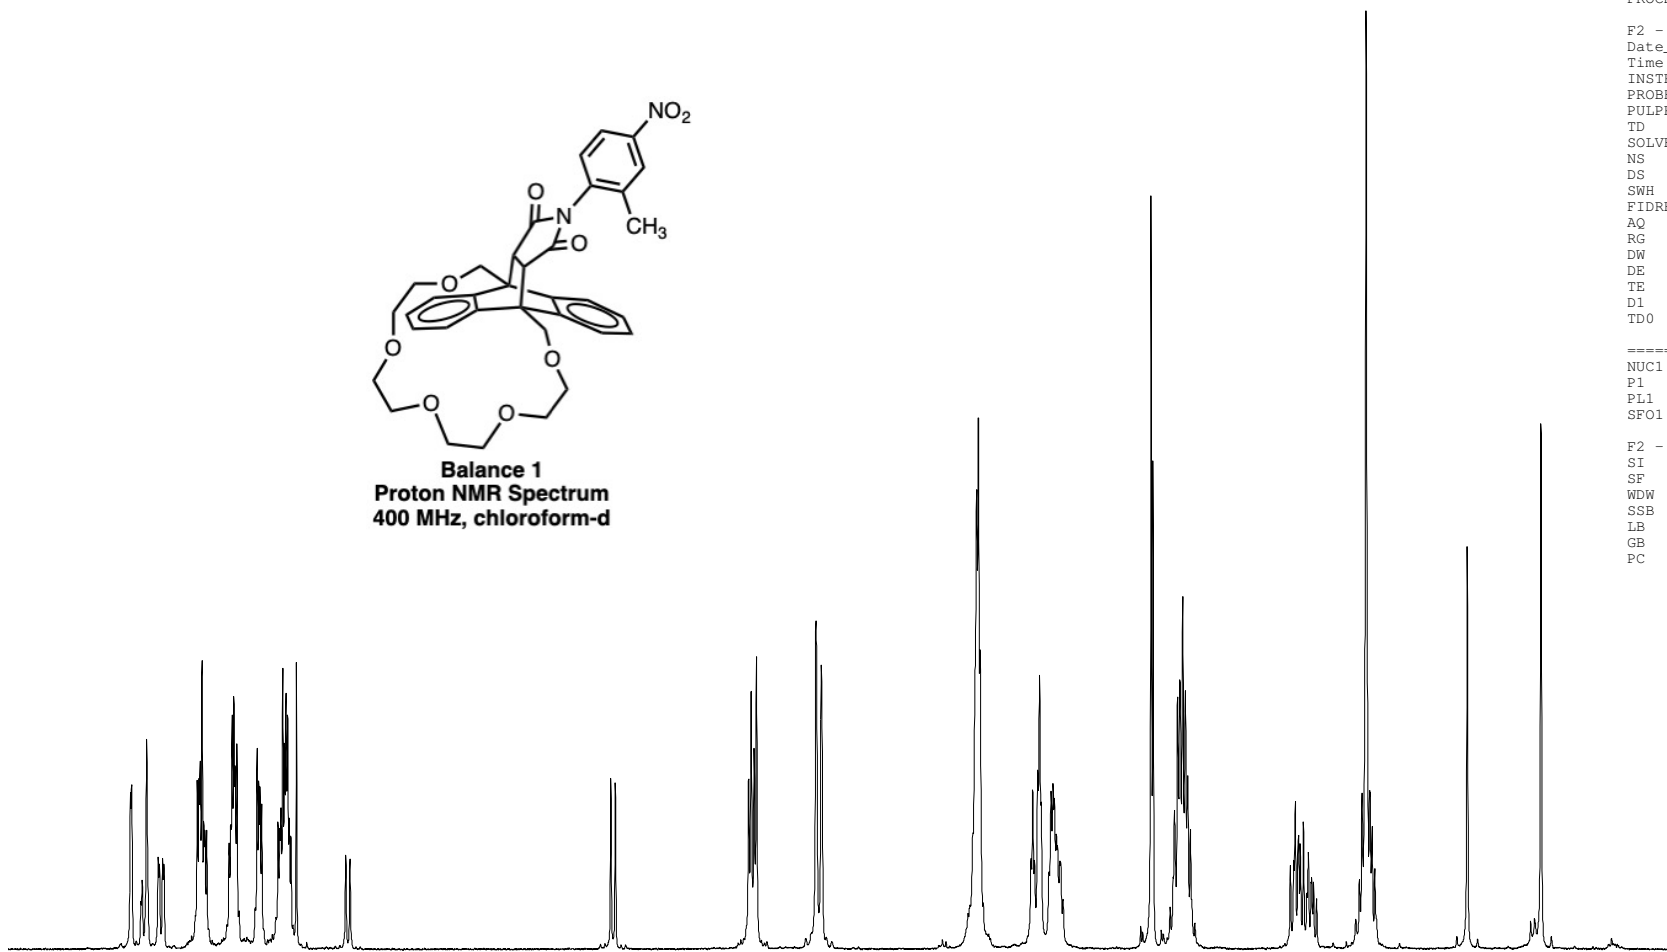

8.5 8.0 7.5 7.0 6.5 6.0 5.5 5.0 4.5 4.0 3.5 3.0 2.5 2.0 1.5 ppm

1.98 2.03 2.00 1.21 2.77 0.38 0.61 2.03 2.01 4.02 2.07 2.04 2.05 4.06 2.04 3.95 1.31

7.991  
7.668  
7.665  
7.657  
7.651  
7.643  
7.283  
7.249  
7.242  
7.228  
7.219  
7.216  
7.209  
7.202  
7.194  
7.189  
7.180  
7.172  
7.166  
7.158  
7.131  
7.122  
7.116  
7.114  
7.108  
7.099  
4.981  
4.957  
4.869  
4.849  
4.845  
4.825  
4.213  
4.187  
4.171  
4.165  
4.151  
4.027  
4.021  
4.016  
3.804  
3.798  
3.793  
3.787  
3.781  
3.694  
3.685  
3.673  
3.661  
3.628  
3.618  
3.613  
3.603  
3.567  
3.555  
3.545  
3.537  
2.233  
1.184

Current Data Parameters  
NAME 18-C-6-Balance-No2  
EXPNO 1  
PROCNO 1

F2 - Acquisition Parameters  
Date\_ 20181120  
Time 18.59  
INSTRUM spect  
PROBHD 5 mm PABBO BB-  
PULPROG zg30  
TD 65536  
SOLVENT CDCl3  
NS 10  
DS 2  
SWH 8012.820 Hz  
FIDRES 0.122266 Hz  
AQ 4.0894465 sec  
RG 203  
DW 62.400 usec  
DE 6.50 usec  
TE 298.0 K  
D1 1.00000000 sec  
TD0 1

===== CHANNEL f1 =====  
SFO1 400.1324710 MHz  
NUC1 1H  
P1 9.30 usec  
PLW1 18.00000000 W

F2 - Processing parameters  
SI 65536  
SF 400.1300000 MHz  
WDW EM  
SSB 0  
LB 0.30 Hz  
GB 0  
PC 1.00

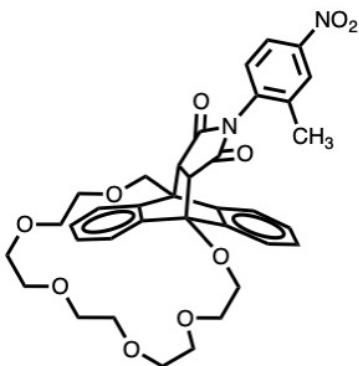

**Balance 2**  
Proton NMR Spectrum  
400 MHz, chloroform-d

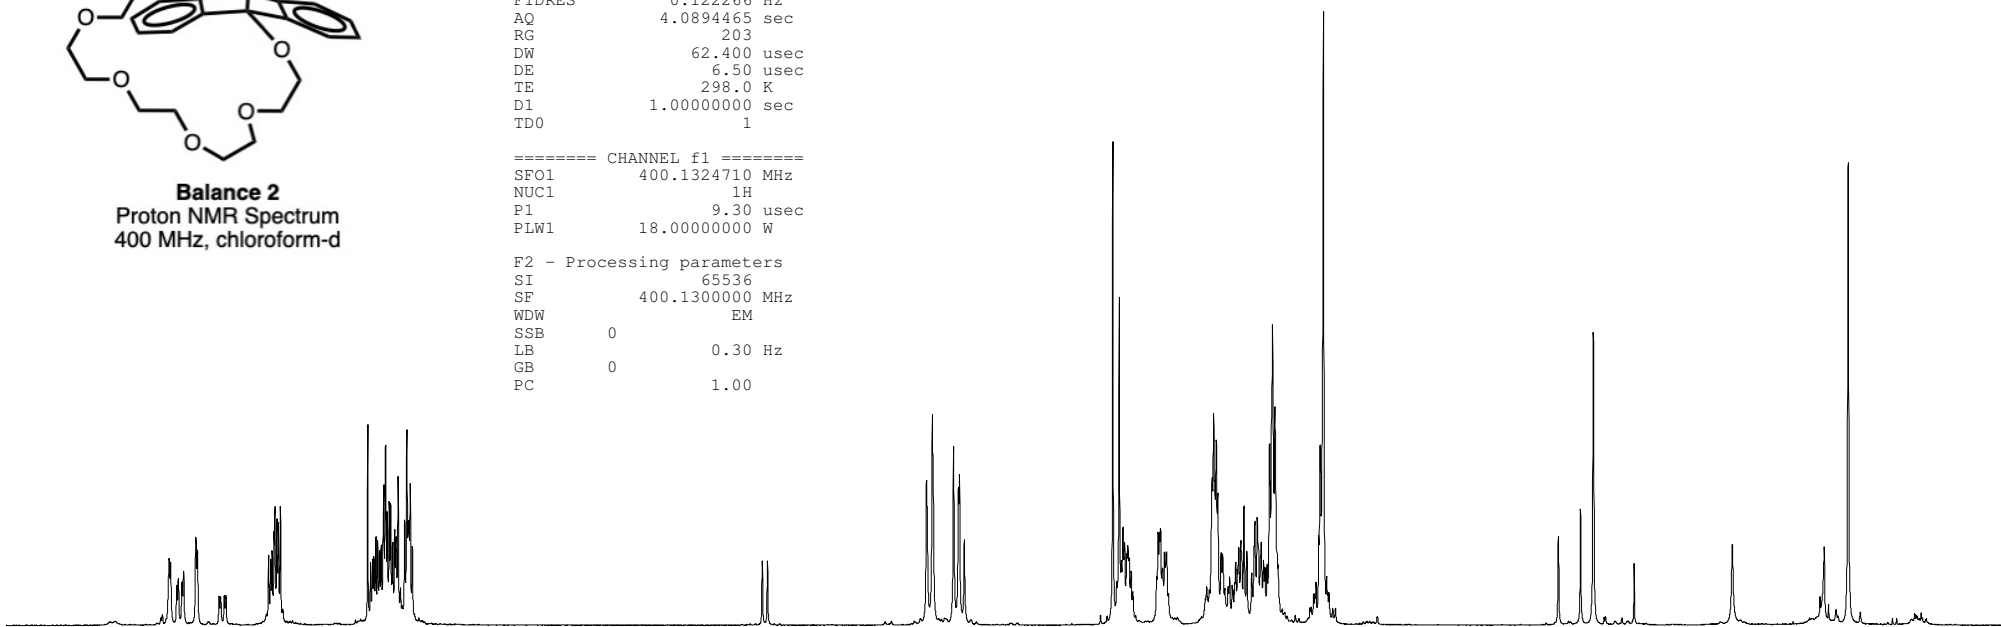

8.5 8.0 7.5 7.0 6.5 6.0 5.5 5.0 4.5 4.0 3.5 3.0 2.5 2.0 1.5 1.0 ppm

0.07  
1.82  
0.41  
2.11  
7.22  
0.38  
2.00  
2.04  
4.02  
2.09  
12.41  
4.07  
1.12  
1.78

175.62  
175.46

147.89  
147.78  
143.17  
142.54  
140.75  
140.38  
138.43  
138.31  
137.18  
137.07  
129.16  
128.89  
126.77  
126.64  
126.08  
125.96  
125.61  
124.22  
124.01  
122.90  
122.11  
121.87  
121.79  
121.63

71.14  
71.00  
70.90  
70.86  
70.76  
70.69  
70.55  
70.38  
70.12  
67.13  
66.94  
49.20  
48.93  
46.07  
45.91

17.80  
16.79

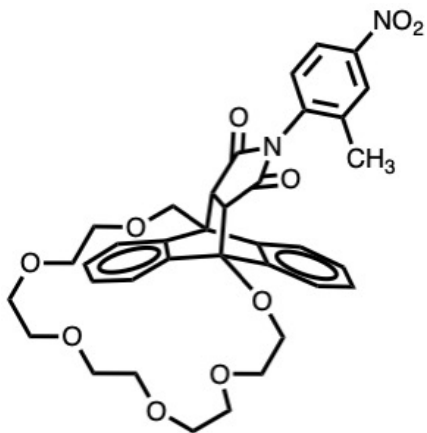

**Balance 2**  
Carbon NMR Spectrum  
400 MHz, chloroform-d

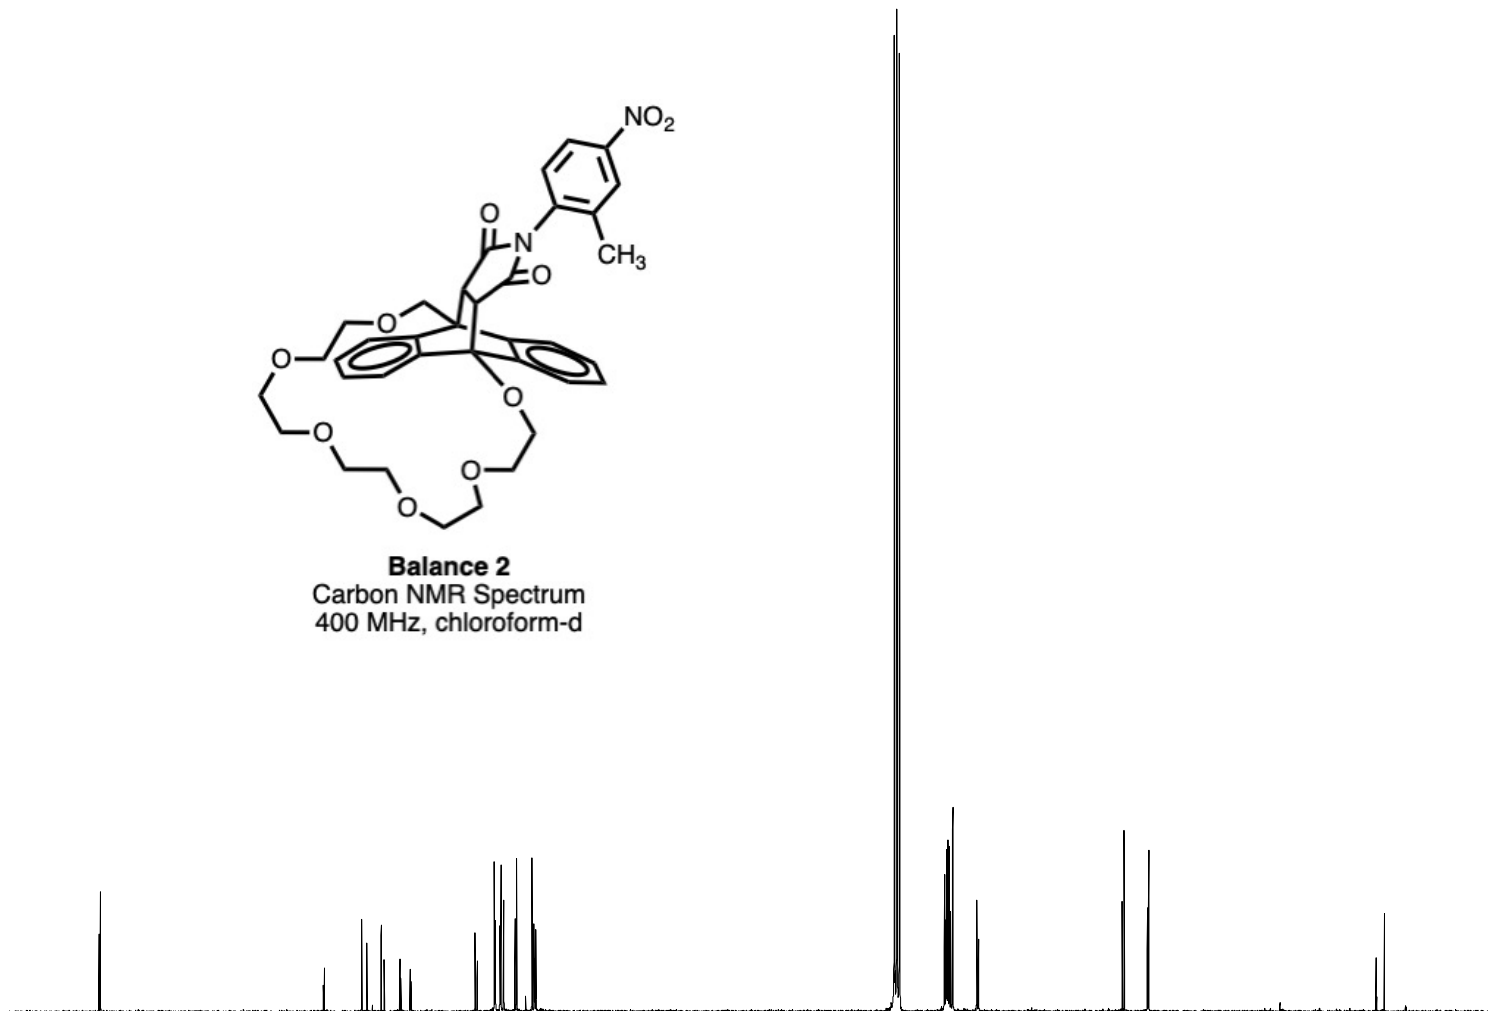

Current Data Parameters  
NAME 18-C-6-Balance-No2-carbon  
EXPNO 1  
PROCNO 1

F2 - Acquisition Parameters  
Date\_ 20181121  
Time 8.17  
INSTRUM spect  
PROBHD 5 mm PABBO BB-  
PULPROG zgpg30  
TD 65536  
SOLVENT CDC13  
NS 13796  
DS 4  
SWH 24038.461 Hz  
FIDRES 0.366798 Hz  
AQ 1.3631488 sec  
RG 2050  
DW 20.800 usec  
DE 6.50 usec  
TE 300.0 K  
D1 2.00000000 sec  
D11 0.03000000 sec  
TD0 1

==== CHANNEL f1 =====  
SFO1 100.6218241 MHz  
NUC1 13C  
P1 7.50 usec  
PLW1 75.00000000 W

==== CHANNEL f2 =====  
SFO2 400.1316005 MHz  
NUC2 1H  
CPDPRG[2] waltz16  
PCPD2 90.00 usec  
PLW2 18.00000000 W  
PLW12 0.19220001 W  
PLW13 0.09667500 W

F2 - Processing parameters  
SI 32768  
SF 100.6127690 MHz  
WDW EM  
SSB 0  
LB 1.00 Hz  
GB 0  
PC 1.40

180 170 160 150 140 130 120 110 100 90 80 70 60 50 40 30 20 ppm

8.092  
8.086  
8.014  
7.826  
7.818  
7.812  
7.803  
7.779  
7.612  
7.603  
7.598  
7.595  
7.589  
7.580  
7.502  
7.494  
7.488  
7.480  
7.419  
7.411  
7.407  
7.405  
7.403  
7.396  
7.388  
7.385  
7.380  
7.285  
7.175  
7.158  
6.801  
6.791  
5.773  
5.751  
5.078  
5.066  
5.052  
5.039  
4.782  
4.776  
4.755  
4.749  
3.989  
3.981  
3.974  
3.642  
3.610  
3.603  
3.488  
3.144  
3.137  
3.131  
3.124  
2.106  
1.720  
1.707  
1.415  
1.283  
1.261

Current Data Parameters  
NAME Aza-tetraethylene-balance  
EXPNO 1  
PROCNO 1

F2 - Acquisition Parameters  
Date\_ 20190117  
Time 10.03  
INSTRUM spect  
PROBHD 5 mm PABBO BE-  
PULPROG zg30  
TD 65536  
SOLVENT CDCl3  
NS 16  
DS 2  
SWH 8012.820 Hz  
FIDRES 0.122266 Hz  
AQ 4.0894465 sec  
RG 181  
DW 62.400 usec  
DE 6.50 usec  
TE 298.0 K  
D1 1.00000000 sec  
TDO 1

===== CHANNEL f1 =====  
SF01 400.1324710 MHz  
NUC1 1H  
P1 9.30 usec  
PLW1 18.00000000 W

F2 - Processing parameters  
SI 65536  
SF 400.1300000 MHz  
WDW EM  
SSB 0  
LB 0.30 Hz  
GB 0  
PC 1.00

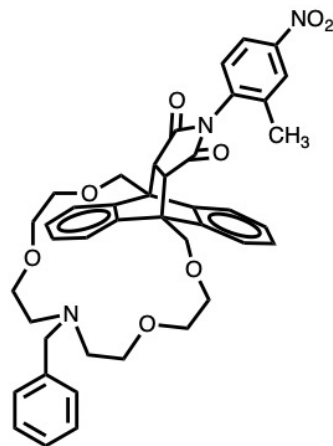

**Balance 1N**  
Proton NMR Spectrum  
400 MHz, chloroform-d

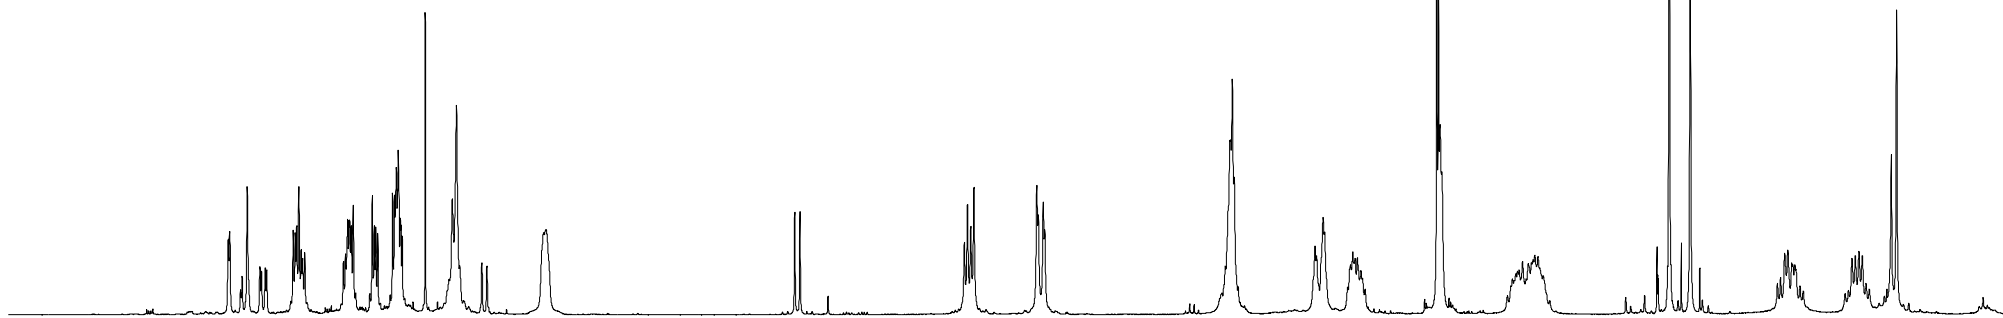

8.5 8.0 7.5 7.0 6.5 6.0 5.5 5.0 4.5 4.0 3.5 3.0 2.5 2.0 1.5 ppm

0.59 0.58 1.91 1.92 1.15 2.75 2.98 0.40 1.90 0.59 2.00 1.96 3.99 4.27 3.95 3.97 3.91 1.69 2.41 2.19

173.63  
173.59

148.08  
147.96  
142.06  
141.40  
140.95  
140.88  
138.82  
138.77  
138.54  
137.79  
136.24  
136.22  
129.01  
128.93  
127.82  
127.09  
126.89  
126.43  
126.33  
125.80  
125.66  
124.98  
124.65  
124.36  
124.25  
121.99  
121.54

72.87  
72.71  
72.34  
72.28  
69.87  
67.86  
67.67

59.99  
59.92  
56.15  
56.08  
51.37  
50.81  
50.52

30.91  
29.70

17.88  
17.17

Current Data Parameters  
NAME Aza-tetraethylene-balance-carbon  
EXPNO 1  
PROCNO 1

F2 - Acquisition Parameters  
Date\_ 20190119  
Time 11.11  
INSTRUM spect  
PROBHD 5 mm PABBO BB-  
PULPROG zgpg30  
TD 65536  
SOLVENT CDC13  
NS 48000  
DS 4  
SWH 24038.461 Hz  
FIDRES 0.366798 Hz  
AQ 1.3631488 sec  
RG 2050  
DW 20.800 usec  
DE 6.50 usec  
TE 300.0 K  
D1 2.0000000 sec  
D11 0.0300000 sec  
TD0 1

===== CHANNEL f1 =====  
SFO1 100.6218241 MHz  
NUC1 13C  
P1 7.50 usec  
PLW1 75.00000000 W

===== CHANNEL f2 =====  
SFO2 400.1316005 MHz  
NUC2 1H  
CPDPRG[2] waltz16  
PCPD2 90.00 usec  
PLW2 18.00000000 W  
PLW12 0.19220001 W  
PLW13 0.09667500 W

F2 - Processing parameters  
SI 32768  
SF 100.6127690 MHz  
WDW EM  
SSB 0  
LB 1.00 Hz  
GB 0  
PC 1.40

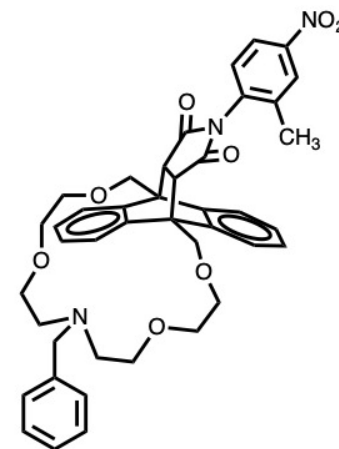

Balance 1<sub>N</sub>  
Carbon NMR Spectrum  
400 MHz, chloroform-d

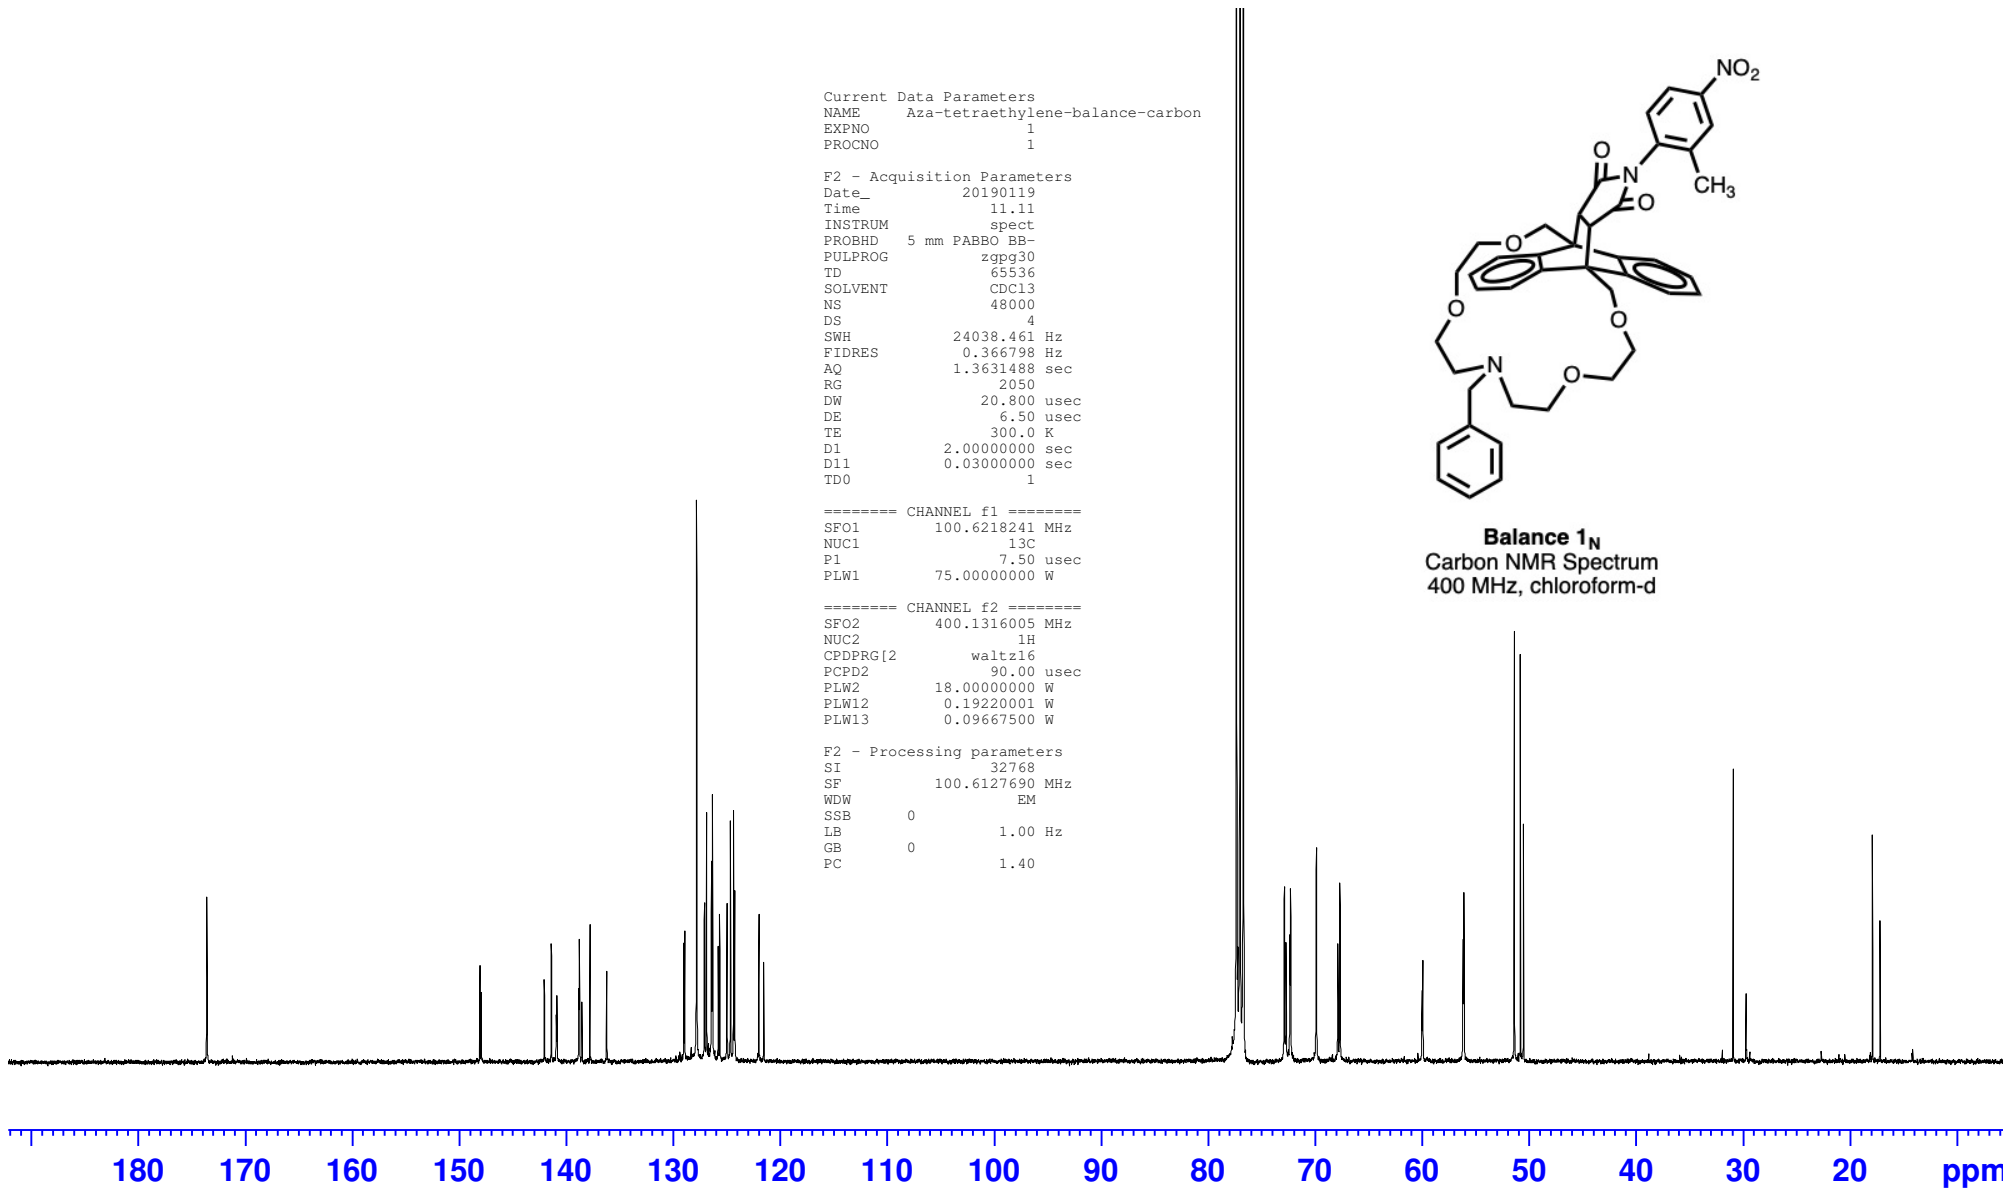

8.112  
8.106  
8.080  
8.074  
8.059  
8.052  
7.994  
7.988  
7.877  
7.685  
7.677  
7.671  
7.663  
7.647  
7.639  
7.633  
7.625  
7.303  
7.281  
7.269  
7.260  
7.253  
7.246  
7.241  
7.232  
7.218  
7.192  
5.668  
5.646  
4.977  
4.954  
4.785  
4.763  
4.039  
4.029  
4.019  
4.010  
3.947  
3.891  
3.881  
3.862  
3.853  
3.842  
3.822  
3.815  
3.811  
3.802  
3.794  
3.785  
3.708  
3.695  
3.685  
3.619  
3.612  
3.600  
3.480  
3.288  
1.172

```

Current Data Parameters
NAME      7-membered-NO2-balance-1
EXPNO    1
PROCNO   1

F2 - Acquisition Parameters
Date_    20170725
Time     9.35
INSTRUM  spect
PROBHD   5 mm PABBO BB-
PULPROG  zg30
TD       65536
SOLVENT  CDCl3
NS       9
DS       2
SWH      8223.685 Hz
FIDRES   0.125483 Hz
AQ       3.9845889 sec
RG       203
DW       60.800 usec
DE       6.00 usec
TE       296.8 K
D1       1.00000000 sec
TD0      1

===== CHANNEL f1 =====
NUC1     1H
P1       9.30 usec
PL1     0 dB
SFO1    400.1324710 MHz

F2 - Processing parameters
SI       32768
SF       400.1300000 MHz
WDW      EM
SSB      0
LB       0.30 Hz
GB       0
PC       1.00
  
```

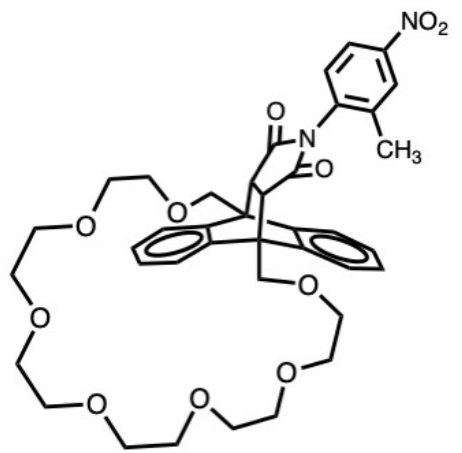

**Balance 3**  
Proton NMR Spectrum  
400 MHz, chloroform-d

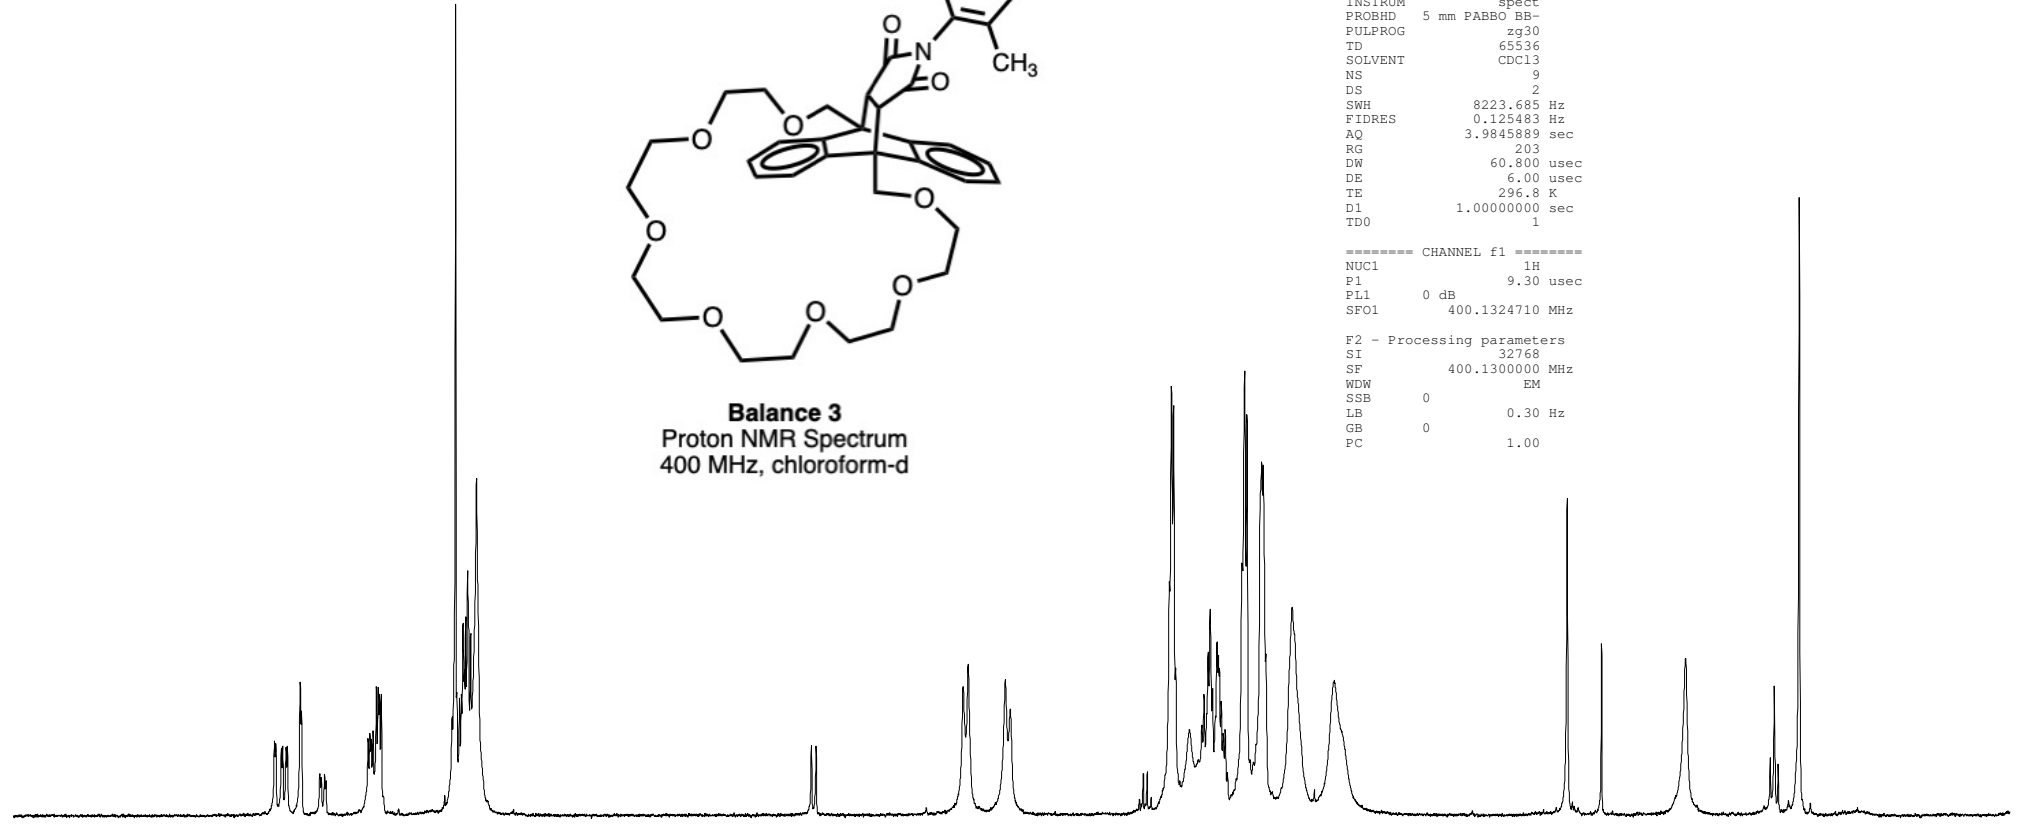

9.0 8.5 8.0 7.5 7.0 6.5 6.0 5.5 5.0 4.5 4.0 3.5 3.0 2.5 2.0 1.5 1.0 ppm

1.00  
0.59  
0.36  
1.89  
5.72  
0.39  
4.00  
9.84  
8.27  
4.08  
3.67  
1.05  
0.32  
0.61  
1.79

174.71  
147.94  
147.84  
143.04  
142.40  
140.37  
139.93  
138.32  
138.27  
136.96  
129.32  
128.83  
126.94  
126.80  
126.25  
126.13  
125.64  
125.60  
124.06  
123.81  
122.38  
121.83  
121.64

71.33  
71.03  
70.98  
70.47  
70.44  
70.31  
67.72  
48.56  
48.27  
46.46

17.92  
16.71

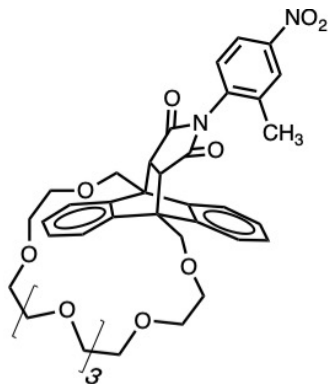

carbon NMR spectrum  
400 MHz, chloroform

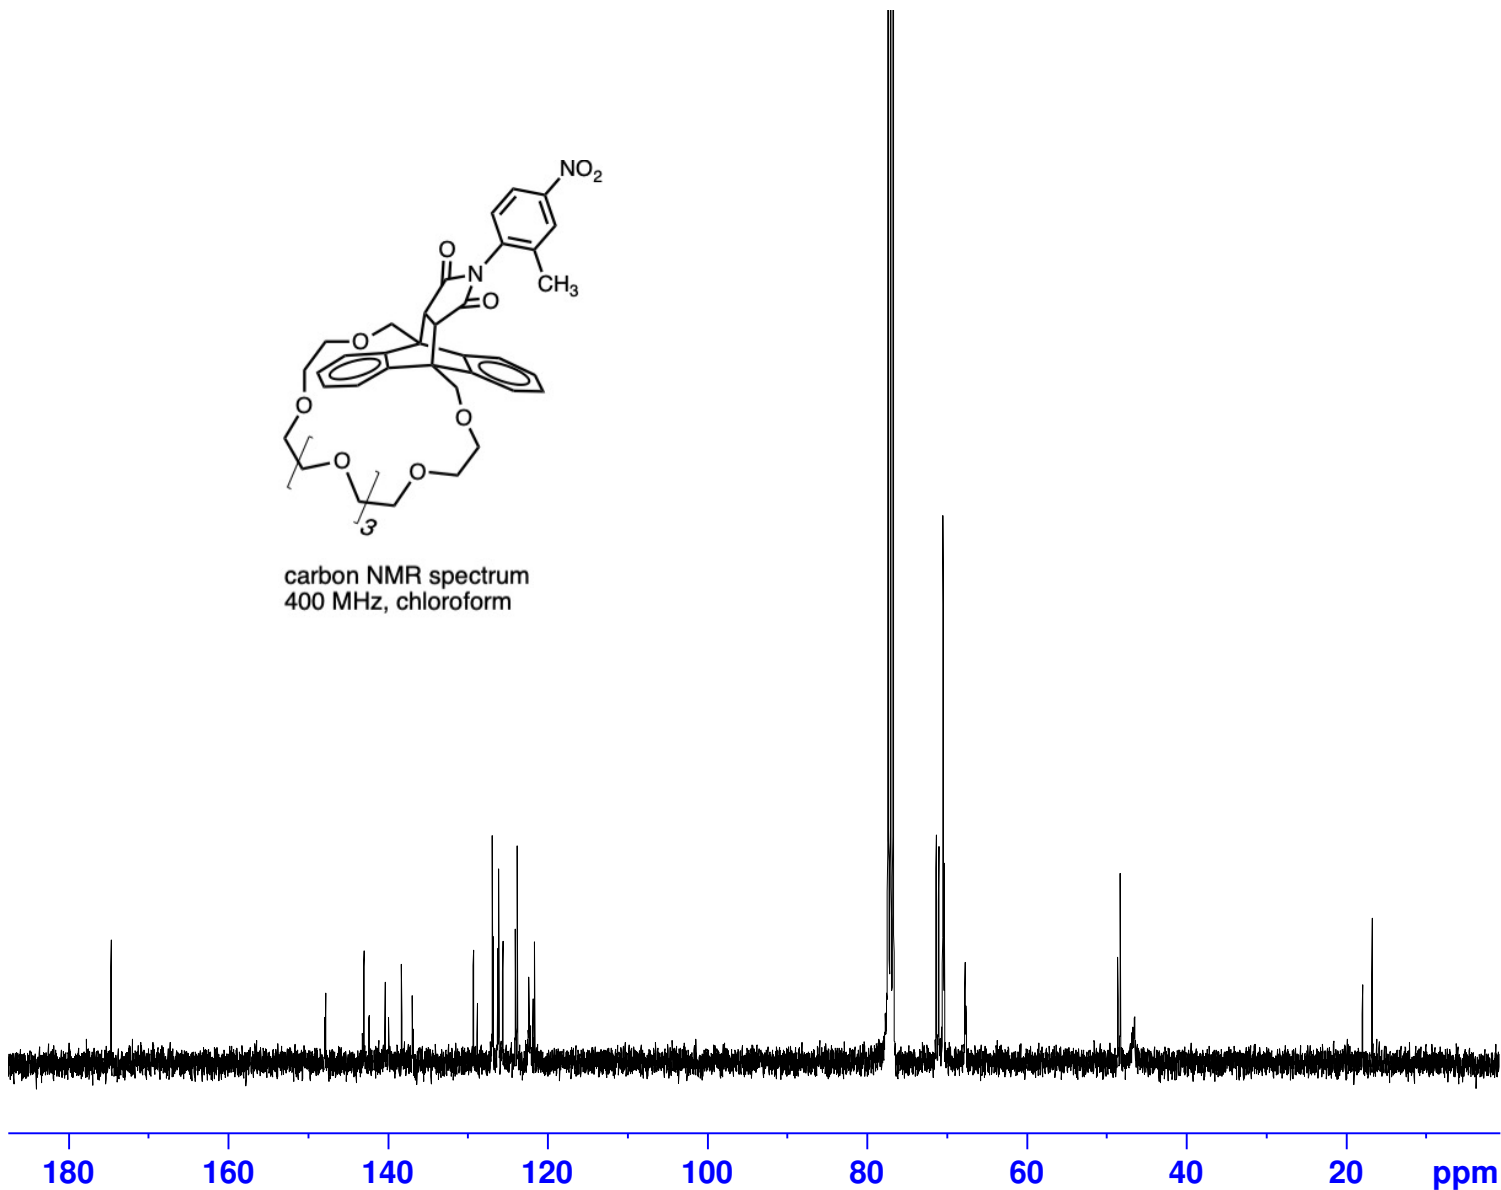

Current Data Parameters  
NAME 21-C-7-Balance-NO2-carbon  
EXPNO 1  
PROCNO 1

F2 - Acquisition Parameters

Date\_ 20231223  
Time 16.51  
INSTRUM spect  
PROBHD 5 mm PABBO BB-  
PULPROG zgpg30  
TD 65536  
SOLVENT CDCl3  
NS 3105  
DS 4  
SWH 24038.461 Hz  
FIDRES 0.366798 Hz  
AQ 1.3631488 sec  
RG 2050  
DW 20.800 usec  
DE 6.50 usec  
TE 300.0 K  
D1 2.00000000 sec  
D11 0.03000000 sec  
TD0 1

===== CHANNEL f1 =====

SFO1 100.6228293 MHz  
NUC1 13C  
P1 7.50 usec  
PLW1 75.00000000 W

===== CHANNEL f2 =====

SFO2 400.1316005 MHz  
NUC2 1H  
CPDPRG[2] waltz16  
PCPD2 90.00 usec  
PLW2 18.00000000 W  
PLW12 0.19220001 W  
PLW13 0.09667500 W

F2 - Processing parameters

SI 32768  
SF 100.6127690 MHz  
WDW EM  
SSB 0  
LB 1.00 Hz  
GB 0  
PC 1.40

8.110  
8.104  
8.064  
8.049  
8.043  
8.004  
7.998  
7.643  
7.634  
7.629  
7.620  
7.615  
7.607  
7.601  
7.593  
7.321  
7.313  
7.307  
7.299  
7.285  
7.275  
7.269  
7.261  
7.257  
7.249  
7.243  
7.235  
7.222  
7.214  
7.200  
7.169  
7.148  
5.668  
5.647  
4.873  
4.849  
4.793  
4.771  
3.954  
3.947  
3.944  
3.936  
3.930  
3.927  
3.919  
3.912  
3.910  
3.901  
3.895  
3.761  
2.201  
1.589  
1.421  
1.419  
1.404  
1.401  
1.386  
1.384  
1.170

```

Current Data Parameters
NAME      control-ether-No2
EXPNO     1
PROCNO    1

F2 - Acquisition Parameters
Date_     20171110
Time      15.14
INSTRUM   spect
PROBHD    5 mm PABBO BB-
PULPROG   zg30
TD         65536
SOLVENT   CDCl3
NS         13
DS         2
SWH        8012.820 Hz
FIDRES     0.122266 Hz
AQ         4.0894465 sec
RG         228
DW         62.400 usec
DE         6.50 usec
TE         298.0 K
D1         1.00000000 sec
TD0        1

===== CHANNEL f1 =====
SF01      400.1324710 MHz
NUC1       1H
P1         9.30 usec
PLW1      18.00000000 W

F2 - Processing parameters
SI         65536
SF         400.1300000 MHz
WDW        EM
SSB        0
LB         0.30 Hz
GB         0
PC         1.00
  
```

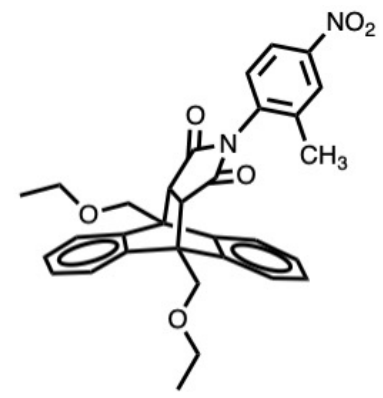

**control C2**  
proton NMR spectrum  
400 MHz, chloroform-d

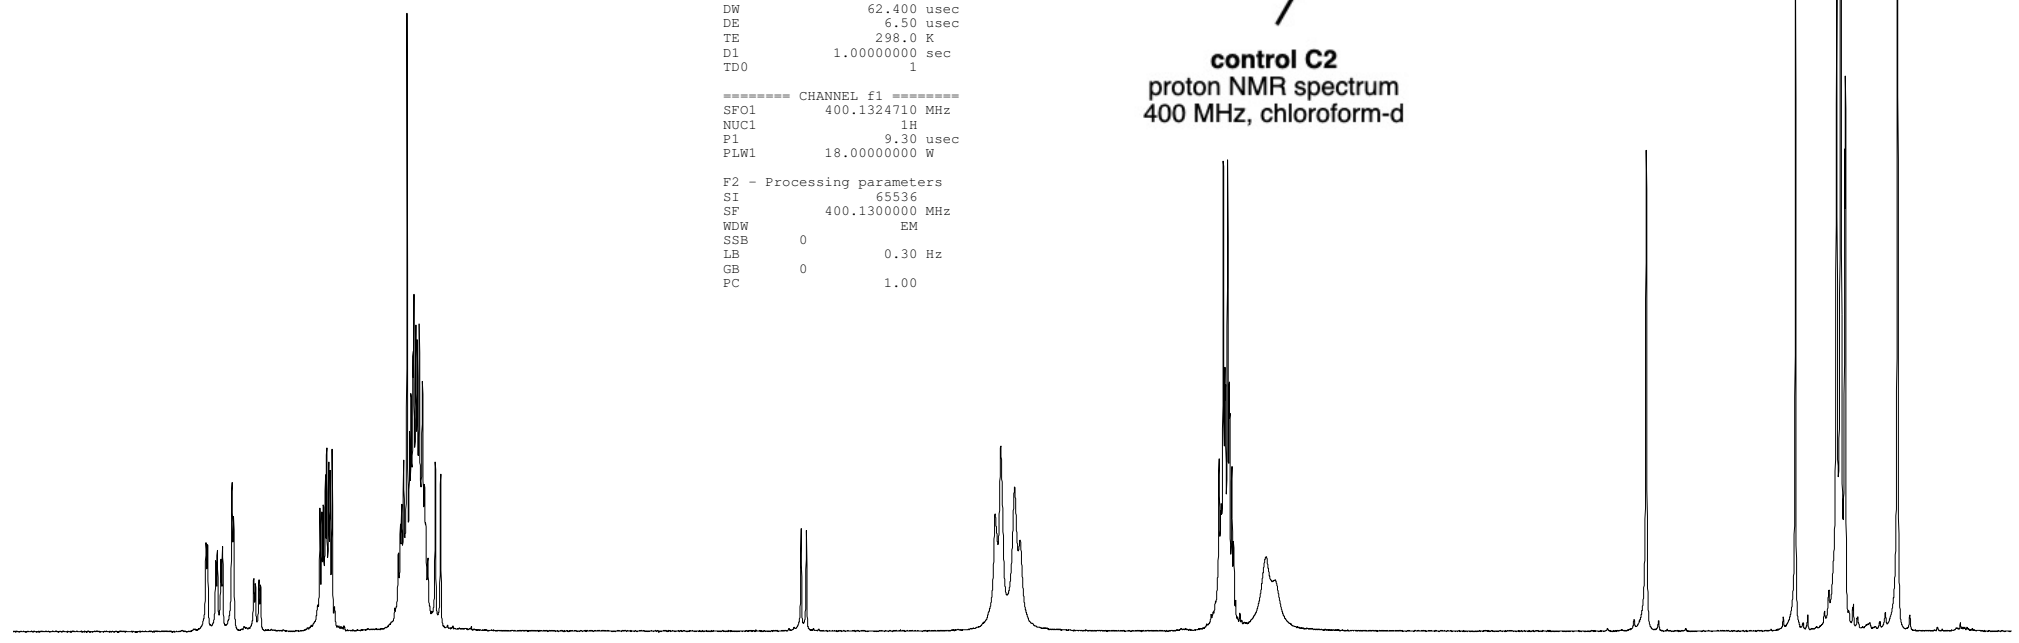

8.5 8.0 7.5 7.0 6.5 6.0 5.5 5.0 4.5 4.0 3.5 3.0 2.5 2.0 1.5 1.0 ppm

1.53 0.37 1.98 7.11 0.39 4.01 6.00 1.19 1.18 6.06 1.84



174.39  
174.34

148.00  
147.90  
142.98  
142.36  
140.17  
139.77  
138.37  
138.15  
136.75  
136.67  
129.23  
128.87  
127.03  
126.87  
126.39  
126.29  
125.70  
125.63  
123.83  
123.63  
122.73  
122.51  
121.90  
121.60

67.40  
67.15

48.41  
48.16  
47.13

17.98  
16.73  
15.31

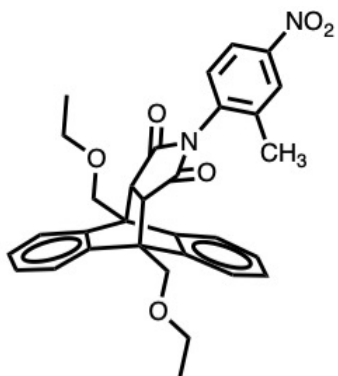

C2

carbon NMR spectrum  
400 MHz, chloroform

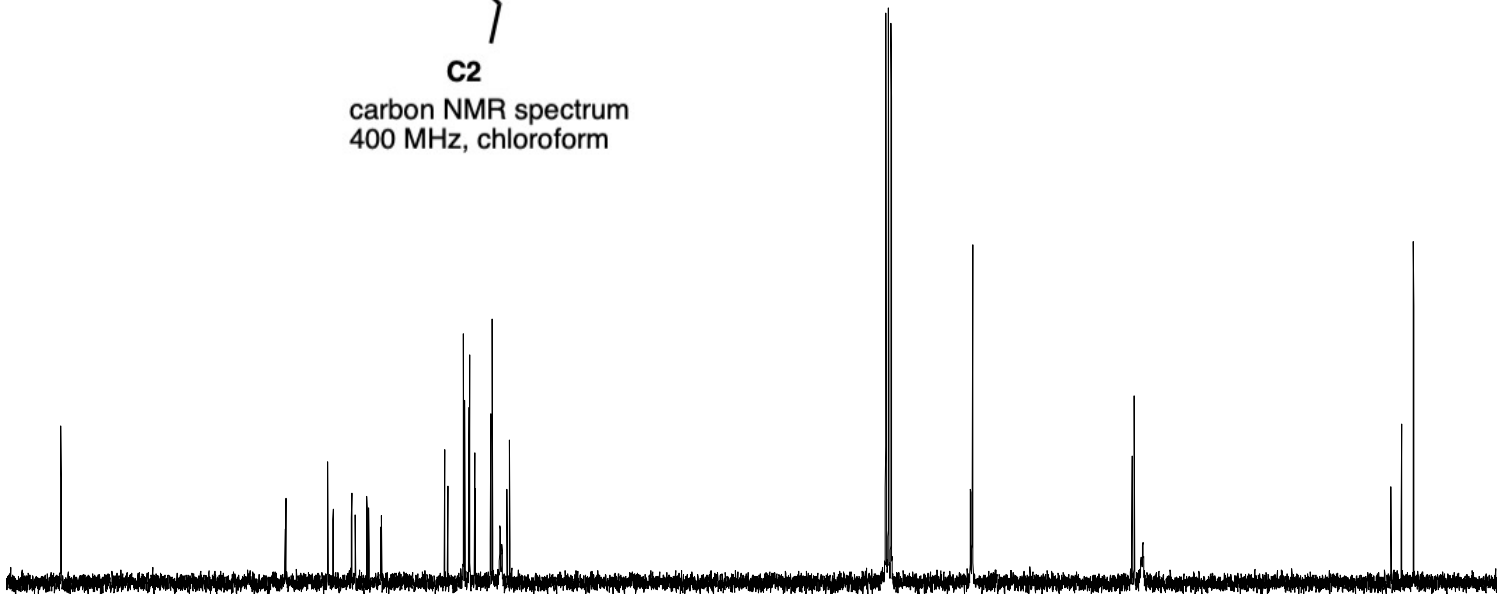

Current Data Parameters  
NAME diethoxy-balance-No2-control-carbon  
EXPNO 1  
PROCNO 1

F2 - Acquisition Parameters  
Date\_ 20231223  
Time 13.39  
INSTRUM spect  
PROBHD 5 mm PABBO BB-  
PULPROG zgpg30  
TD 65536  
SOLVENT CDC13  
NS 218  
DS 4  
SWH 24038.461 Hz  
FIDRES 0.366798 Hz  
AQ 1.3631488 sec  
RG 2050  
DW 20.800 usec  
DE 6.50 usec  
TE 300.0 K  
D1 2.00000000 sec  
D11 0.03000000 sec  
TD0 1

===== CHANNEL f1 =====  
SFO1 100.6228293 MHz  
NUC1 13C  
P1 7.50 usec  
PLW1 75.0000000 W

===== CHANNEL f2 =====  
SFO2 400.1316005 MHz  
NUC2 1H  
CPDPRG[2] waltz16  
PCPD2 90.00 usec  
PLW2 18.00000000 W  
PLW12 0.19220001 W  
PLW13 0.09667500 W

F2 - Processing parameters  
SI 32768  
SF 100.6127690 MHz  
WDW EM  
SSB 0  
LB 1.00 Hz  
GB 0  
PC 1.40

170 160 150 140 130 120 110 100 90 80 70 60 50 40 30 20 ppm

8.000  
7.994  
7.910  
7.904  
7.889  
7.883  
7.694  
7.686  
7.680  
7.672  
7.663  
7.655  
7.649  
7.641  
7.268  
7.262  
7.254  
7.251  
7.243  
7.237  
7.229  
7.218  
7.210  
7.163  
7.141  
5.677  
5.655  
4.917  
4.894  
4.875  
4.852  
4.050  
4.039  
4.032  
4.026  
4.023  
4.019  
4.013  
4.010  
4.000  
3.761  
3.757  
3.750  
3.743  
3.738  
3.732  
3.458  
2.194

control C1  
proton NMR spectrum  
400 MHz, chloroform-d

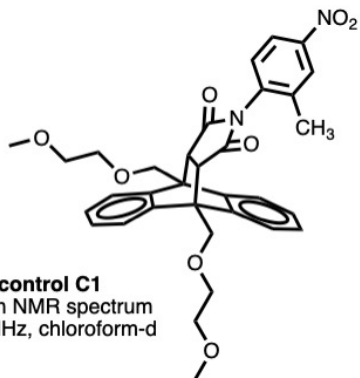

Current Data Parameters  
NAME balance-NO2-control-ethyleneglycol-monomethylether  
EXPNO 1  
PROCNO 1

F2 - Acquisition Parameters  
Date\_ 20190318  
Time 16.42  
INSTRUM spect  
PROBHD 5 mm PABBO BB-  
PULPROG zg30  
TD 65536  
SOLVENT CDCl3  
NS 16  
DS 2  
SWH 8012.820 Hz  
FIDRES 0.122266 Hz  
AQ 4.0894465 sec  
RG 287  
DW 62.400 usec  
DE 6.50 usec  
TE 298.0 K  
D1 1.00000000 sec  
TD0 1

===== CHANNEL f1 =====  
SFO1 400.1324710 MHz  
NUC1 1H  
P1 9.30 usec  
PLW1 18.00000000 W

F2 - Processing parameters  
SI 65536  
SF 400.1300000 MHz  
WDW EM  
SSB 0  
LB 0.30 Hz  
GB 0  
PC 1.00

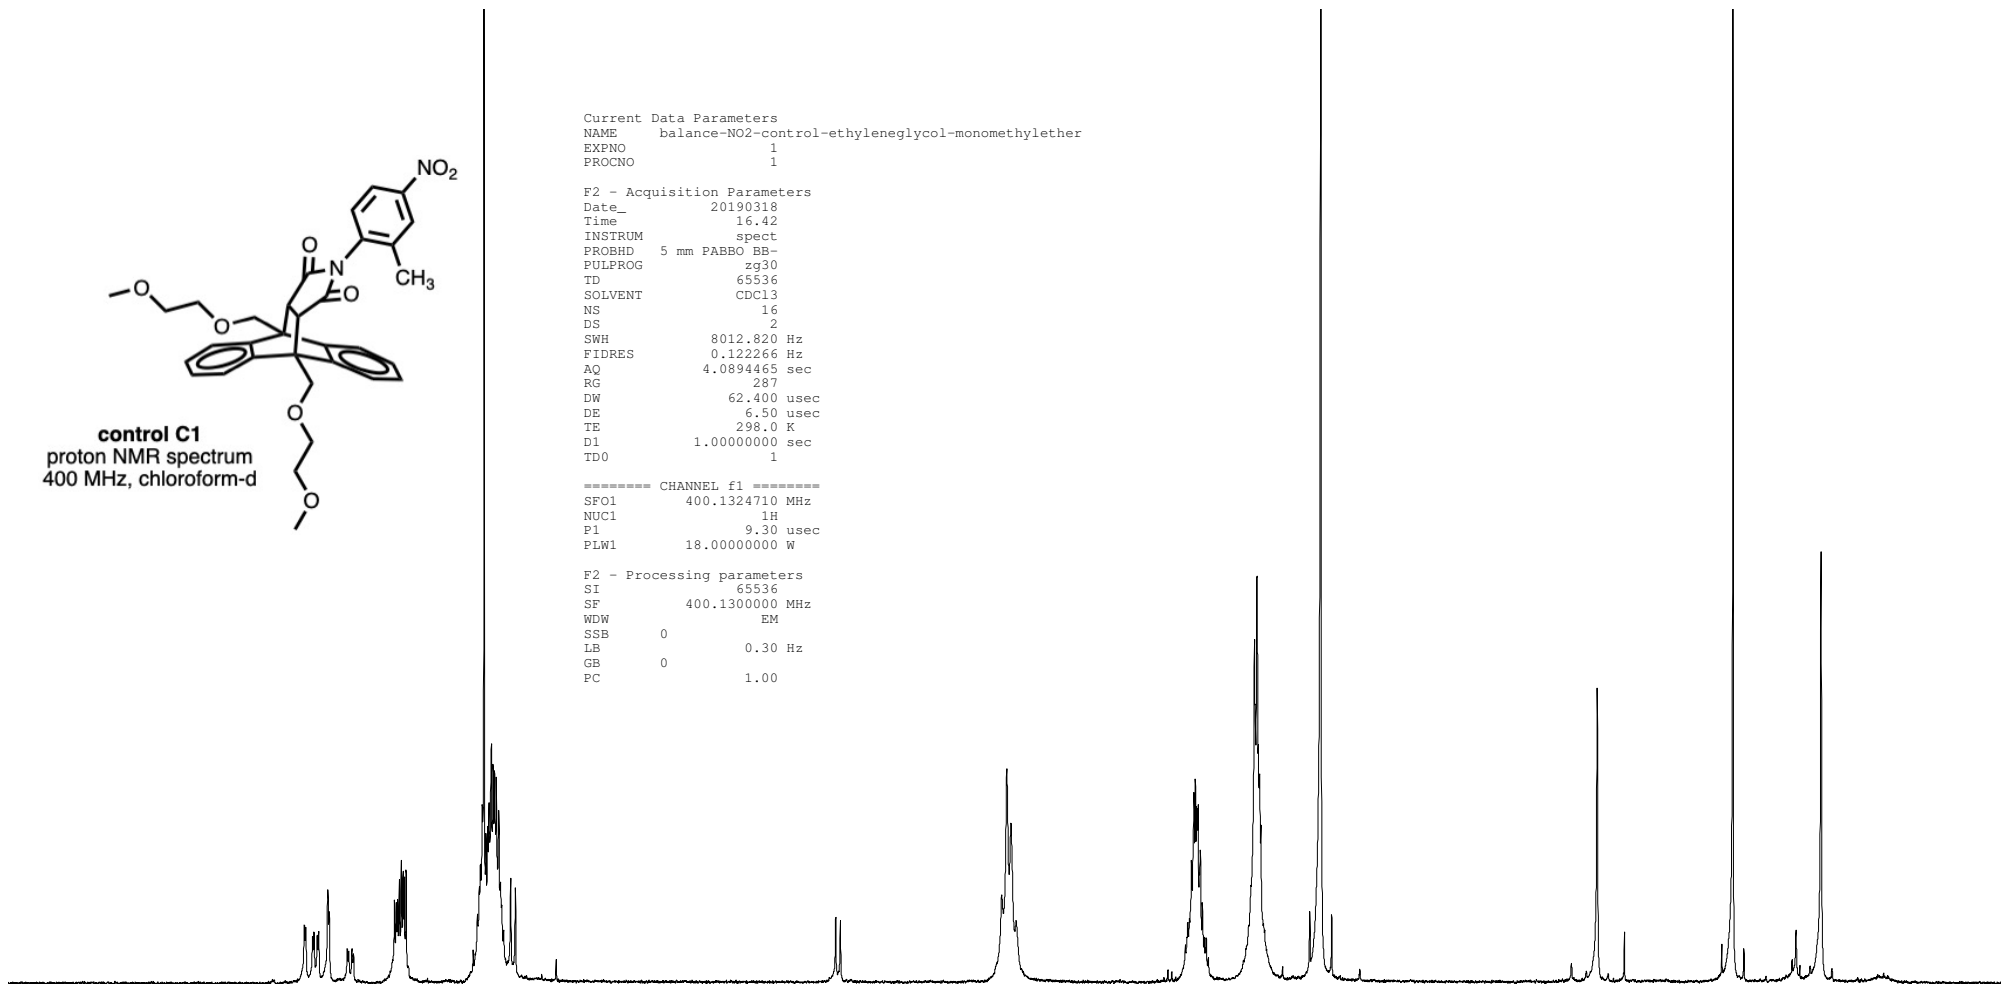

1.170

9.0 8.5 8.0 7.5 7.0 6.5 6.0 5.5 5.0 4.5 4.0 3.5 3.0 2.5 2.0 1.5 1.0 ppm

1.90 1.92 7.51 0.75 0.40 4.00 3.96 5.98 6.08 1.26 1.87

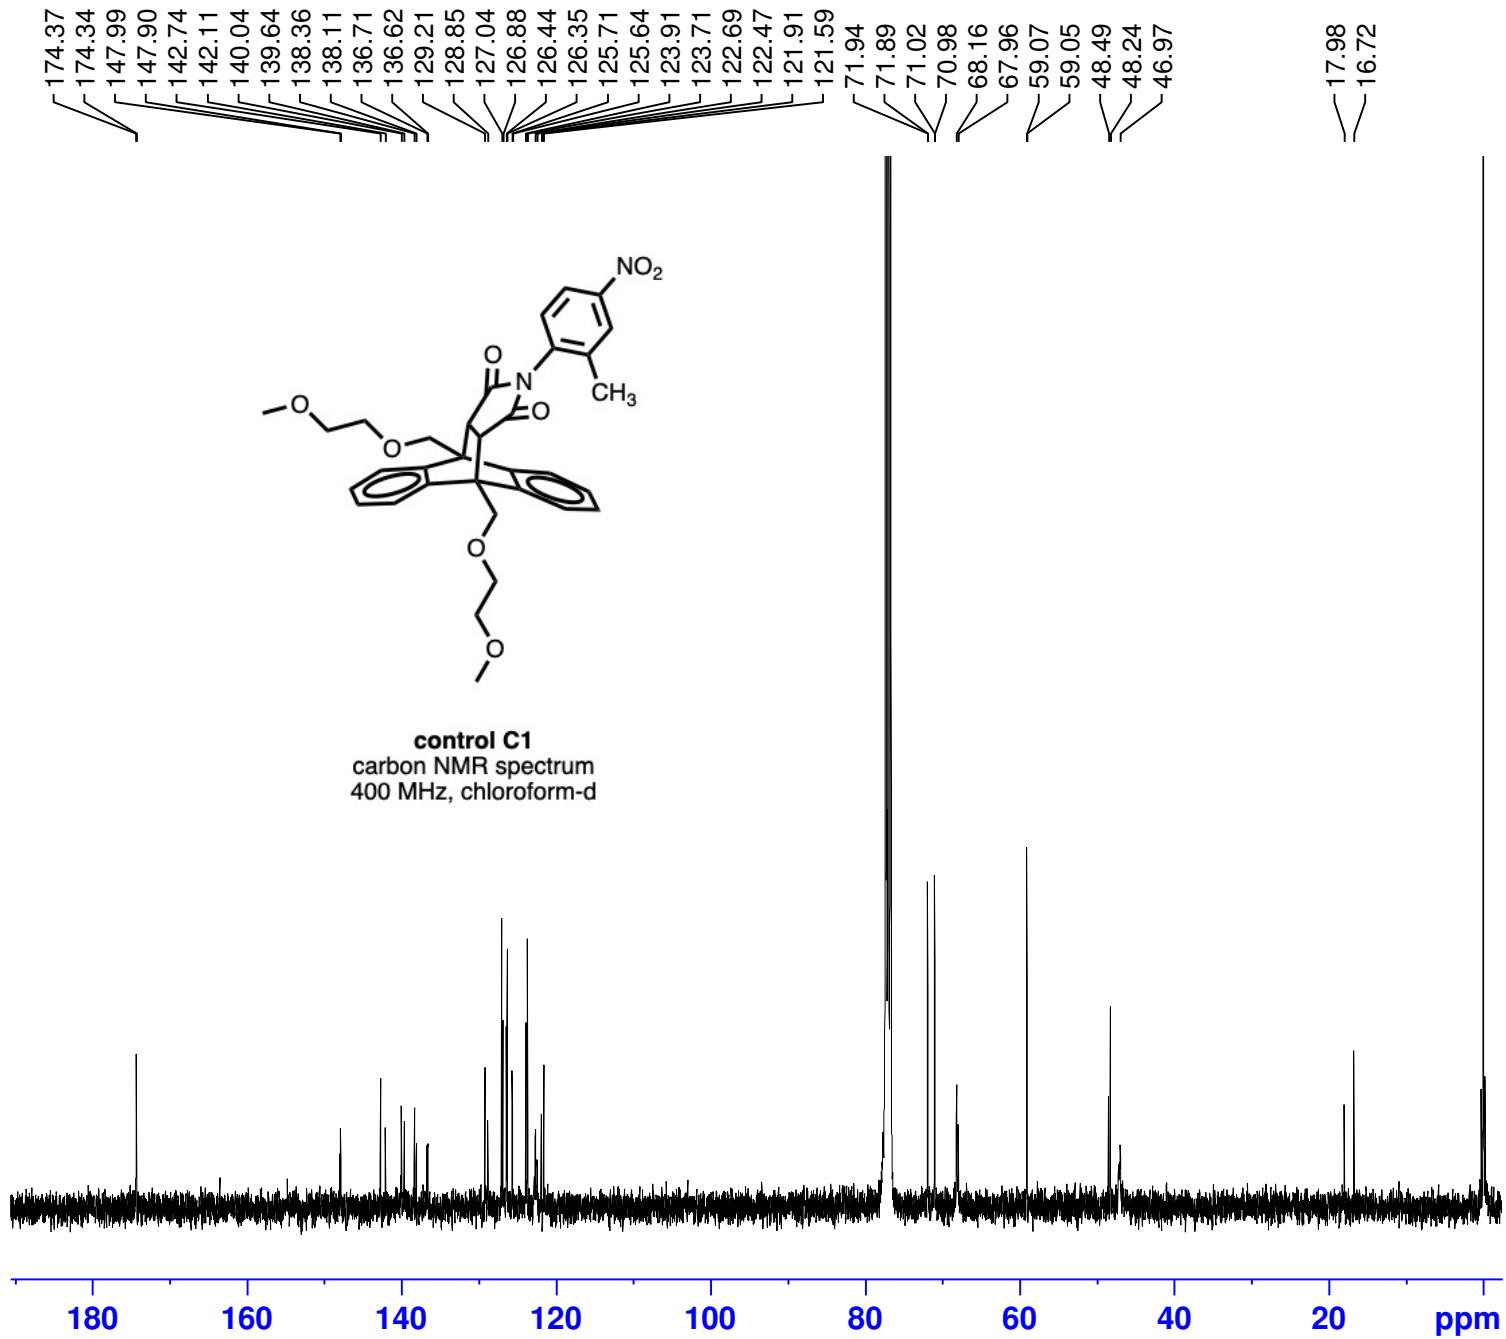

Current Data Parameters  
 NAME balance-NO2-control-ethyleneglycol-monomethylether-carbon  
 EXPNO 1  
 PROCNO 1

F2 - Acquisition Parameters  
 Date\_ 20190319  
 Time 7.06  
 INSTRUM spect  
 PROBHD 5 mm F4BBO BB-  
 PULPROG zgpg30  
 TD 65536  
 SOLVENT CDCl3  
 NS 15000  
 DS 4  
 SWH 24038.461 Hz  
 FIDRES 0.366798 Hz  
 AQ 1.3531488 sec  
 RG 2050  
 DW 20.800 usec  
 DE 6.50 usec  
 TE 300.0 K  
 D1 2.0000000 sec  
 D11 0.0300000 sec  
 TDO 1

===== CHANNEL f1 =====  
 SFO1 100.6228303 MHz  
 NUC1 13C  
 P1 7.50 usec  
 PLW1 75.00000000 W

===== CHANNEL 12 =====  
 SFO2 400.1316005 MHz  
 NUC2 1H  
 CPDPRG2 waltz16  
 PCPD2 80.00 usec  
 PLW2 18.00000000 W  
 PLW12 0.19220001 W  
 PLW13 0.09667500 W

F2 - Processing parameters  
 SI 32768  
 SF 100.6127690 MHz  
 WDW EM  
 SSB 0  
 LB 1.00 Hz  
 GB 0  
 PC 1.40

7.742  
7.734  
7.727  
7.719  
7.598  
7.589  
7.583  
7.575  
7.566  
7.450  
7.442  
7.435  
7.352  
7.344  
7.338  
7.332  
7.330  
7.325  
7.319  
7.285  
5.103  
5.097  
5.077  
5.071  
4.728  
4.702  
3.972  
3.962  
3.952  
3.724  
3.700  
3.691  
3.634  
3.623  
3.137  
3.130  
3.027  
3.025  
3.009  
3.004  
2.997  
2.988  
2.983  
2.965  
2.104  
1.472  
1.449  
1.362  
1.340  
1.327

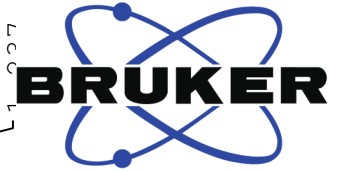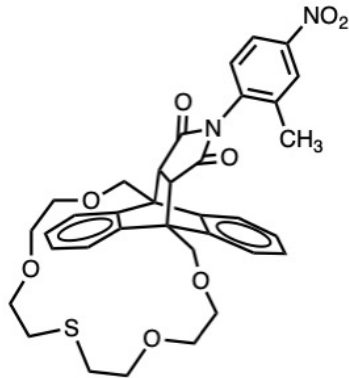

**Balance 1s**  
Proton NMR Spectrum  
400 MHz, chloroform-d

Current Data Parameters  
NAME 15c5-anthracene-sulfide-balance-chloroform-2  
EXPNO 1  
PROCNO 1

F2 - Acquisition Parameters  
Date\_ 20180129  
Time 16.51  
INSTRUM spect  
PROBHD 5 mm PABBO BB-  
PULPROG zg30  
TD 65536  
SOLVENT CDCl3  
NS 12  
DS 2  
SWH 9012.820 Hz  
FIDRES 0.122266 Hz  
AQ 4.0894465 sec  
RG 256  
DW 62.400 usec  
DE 6.50 usec  
TE 298.0 K  
D1 1.00000000 sec  
TDO 1

===== CHANNEL f1 =====  
SFO1 400.1324710 MHz  
NUC1 1H  
P1 9.30 usec  
PLW1 18.00000000 W

F2 - Processing parameters  
SI 65536  
SF 400.1300000 MHz  
WDW EM  
SSB 0  
LB 0.30 Hz  
GB 0  
PC 1.00

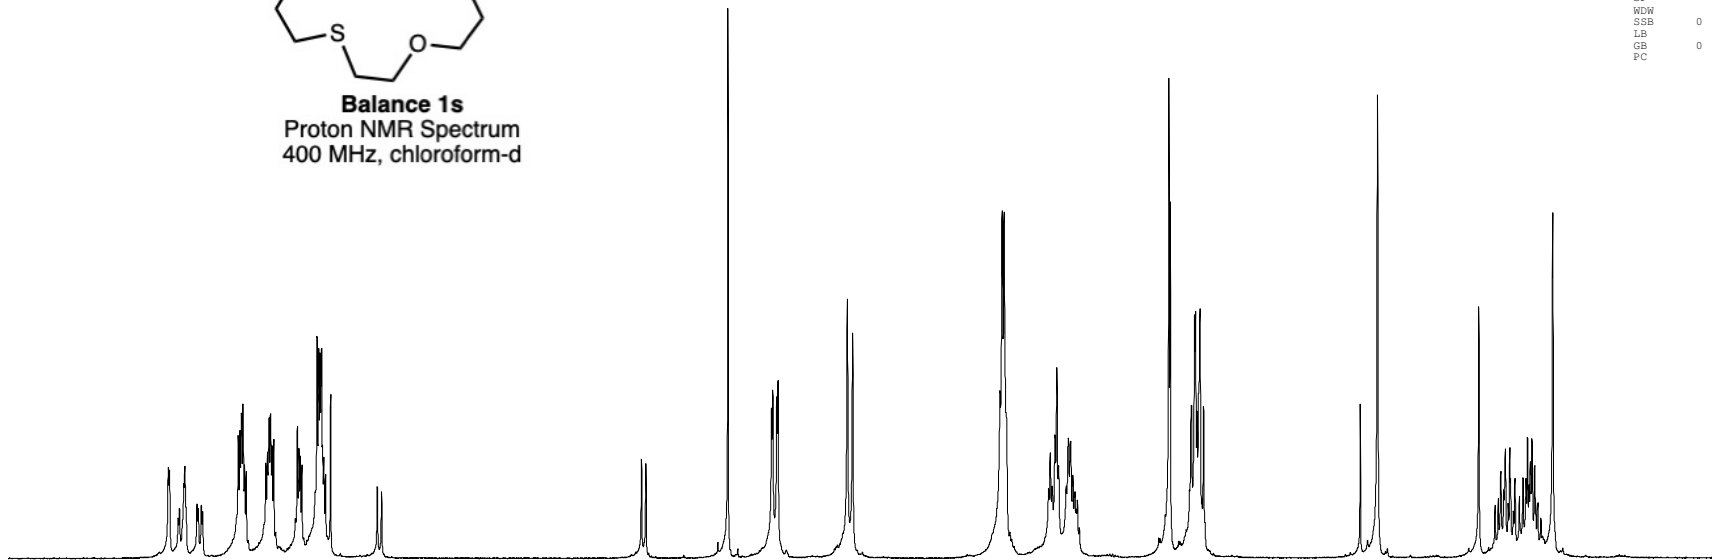

8.5 8.0 7.5 7.0 6.5 6.0 5.5 5.0 4.5 4.0 3.5 3.0 2.5 2.0 1.5 1.0 ppm

1.99 2.02 2.10 1.21 2.80 0.43 0.54 2.01 2.00 4.07 2.30 1.90 2.04 3.94 1.60 4.06 1.29

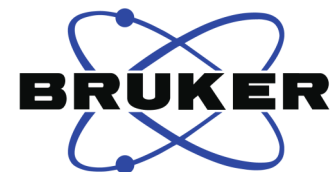

173.57  
173.54

148.09  
147.98  
141.95  
141.32  
138.75  
138.67  
138.50  
137.80  
136.21  
129.01  
128.89  
127.01  
126.82  
126.52  
126.42  
125.81  
125.67  
125.19  
124.84  
124.29  
124.21  
121.98  
121.55

72.81  
72.76  
71.96  
71.84  
70.57  
67.93  
67.70

53.41  
51.17  
50.46  
50.20

31.51  
31.47

17.87  
17.07

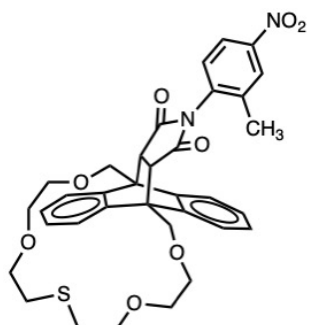

**Balance 1s**  
Carbon NMR Spectrum  
400 MHz, chloroform-d

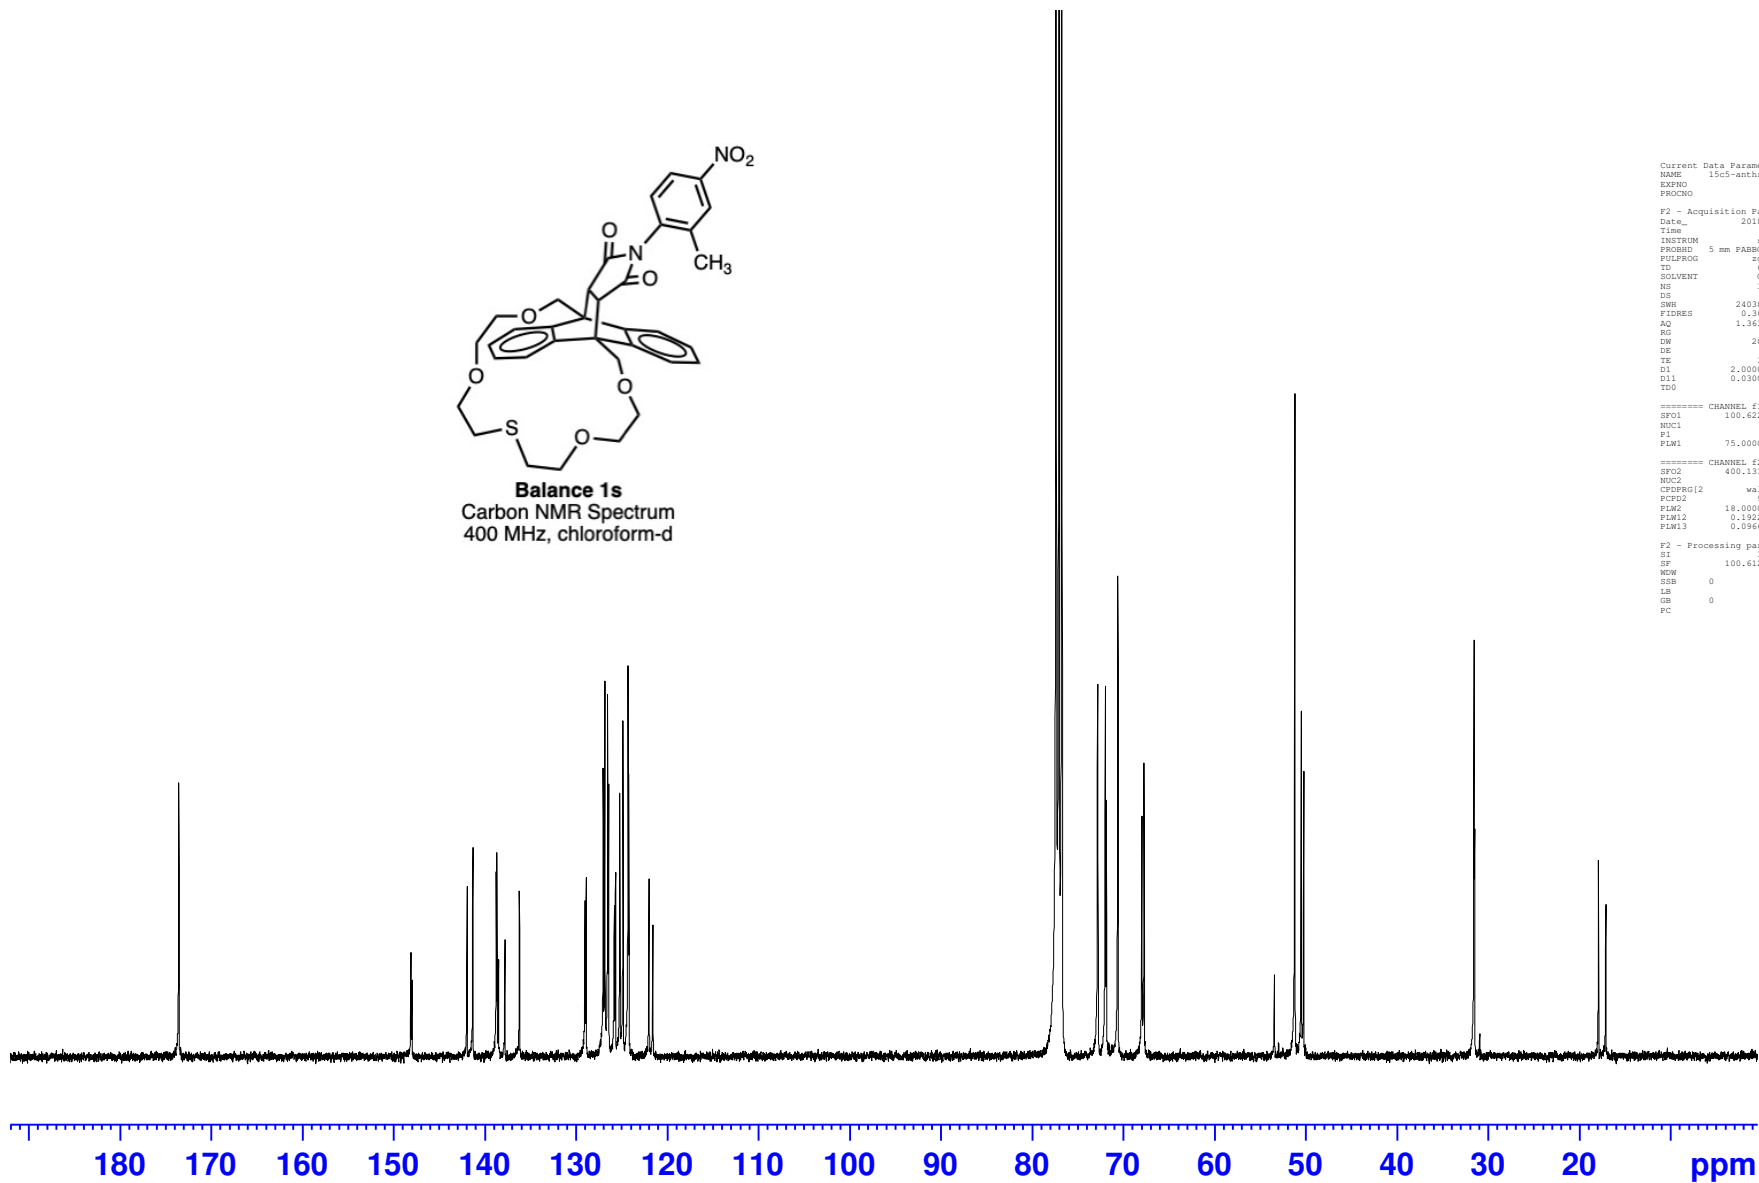

```
Current Data Parameters
NAME 15c5-anthracene-sulfide-balance-chloroform-2carbon
EXPNO 1
PROCNO 1

F2 - Acquisition Parameters
Date_ 20190331
Time 6.36
INSTRUM spect
PROBHD 5 mm PABBO BH-
PULPROG zgpg30
TD 65536
SOLVENT cdcl3
NS 36196
DS 4
SWH 24038.461 Hz
FIDRES 0.366798 Hz
AQ 1.3631488 sec
RG 2050
DW 20.800 usec
DE 6.50 usec
TE 300.0 K
D1 2.00000000 sec
D11 0.03000000 sec
TDO 1

===== CHANNEL f1 =====
SF01 100.6223272 MHz
NUC1 13C
P1 7.50 usec
PLM1 75.00000000 W

===== CHANNEL f2 =====
SF02 400.1316005 MHz
NUC2 1H
CPCPRG2 waltz16
PCPD2 90.00 usec
PLM2 18.00000000 W
PLM12 0.19220001 W
PLM13 0.09667500 W

F2 - Processing parameters
SI 32768
SF 100.6127690 MHz
NCW EM
SSB 0
LB 1.00 Hz
GB 0
PC 1.40
```
